# Supplementary material for: Steroid Alkaloids from Holarrhena africana with Strong Activity against Trypanosoma brucei rhodesiense
Source: PubMed Central journal article supplement (PMC6152089; doi:10.3390/molecules22071129), 2017-07-06
Supplement: molecules-22-01129-s001.pdf [file molecules-22-01129-s001.pdf]

**Supplementary Material****Steroid Alkaloids from *Holarrhena africana* with strong activity against *Trypanosoma brucei rhodesiense*****Charles O. Nnadi<sup>1,2</sup>, Ngozi J. Nwodo<sup>2</sup>, Marcel Kaiser<sup>3,4</sup>, Reto Brun<sup>3,4</sup> and Thomas J. Schmidt<sup>1,\*</sup>**

- <sup>1</sup> Institute of Pharmaceutical Biology and Phytochemistry (IPBP), University of Münster, PharmaCampus Corrensstraße 48, Münster D-48149, Germany; E-mail: [charles.nnadi@unn.edu.ng](mailto:charles.nnadi@unn.edu.ng) (CON); [thomschm@uni-muenster.de](mailto:thomschm@uni-muenster.de) (TJS)
- <sup>2</sup> Department of Pharmaceutical and Medicinal Chemistry, Faculty of Pharmaceutical Sciences, University of Nigeria Nsukka, 410001 Enugu State Nigeria; E-mail: [ngozi.nwodo@unn.edu.ng](mailto:ngozi.nwodo@unn.edu.ng) (NJN)
- <sup>3</sup> Swiss Tropical and Public Health institute (Swiss TPH), Socinstr. 57, Basel CH-4051, Switzerland; Email: [marcel.kaiser@unibas.ch](mailto:marcel.kaiser@unibas.ch) (MK); [reto.brun@unibas.ch](mailto:reto.brun@unibas.ch) (RB)
- <sup>4</sup> University of Basel, Petersplatz 1, Basel CH-4003, Switzerland

\*Correspondence: [thomschm@uni-muenster.de](mailto:thomschm@uni-muenster.de); Tel.: +49-251-83-33378

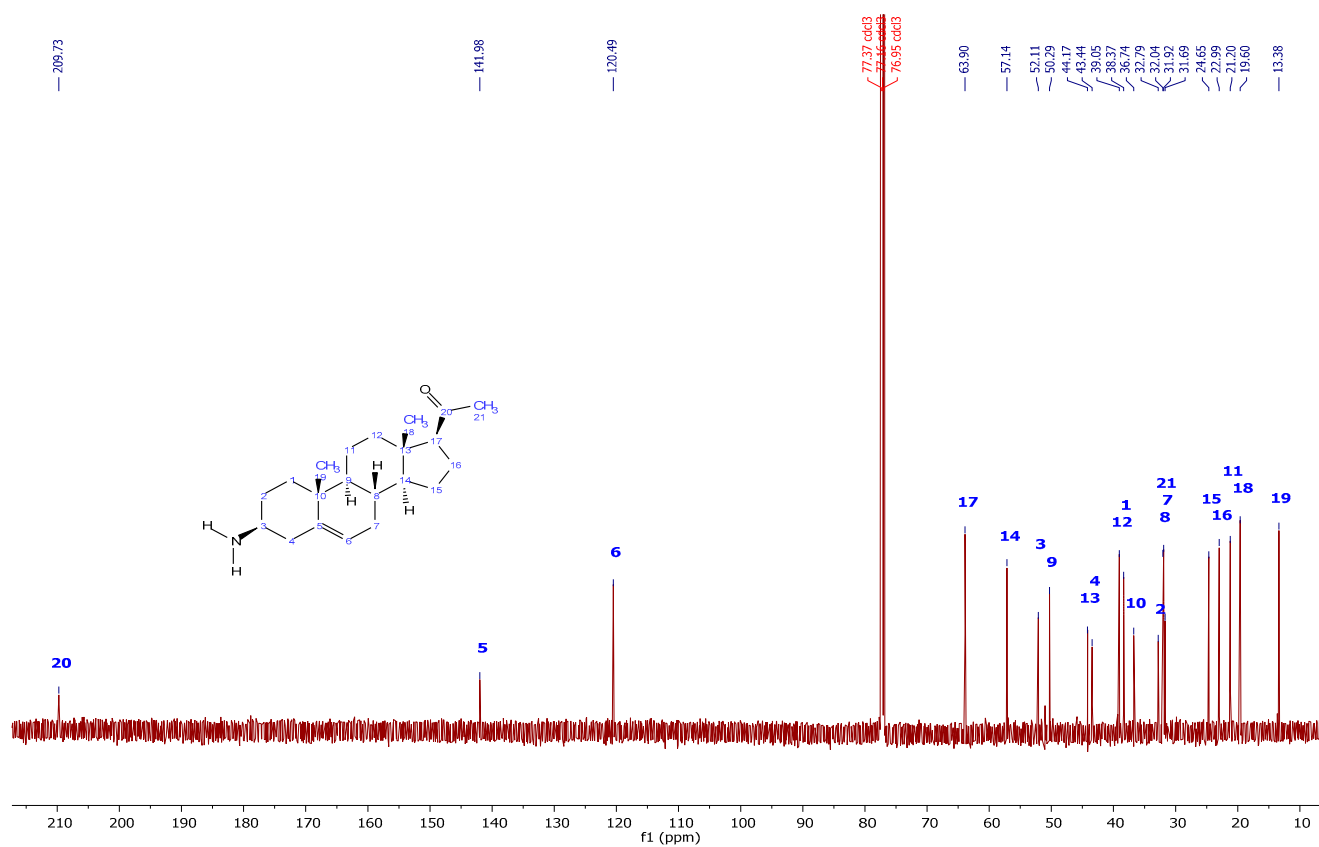

Figure S1:  $^{13}\text{C}$  NMR spectrum of compound 1 ( $\text{CDCl}_3$ , 600 MHz)

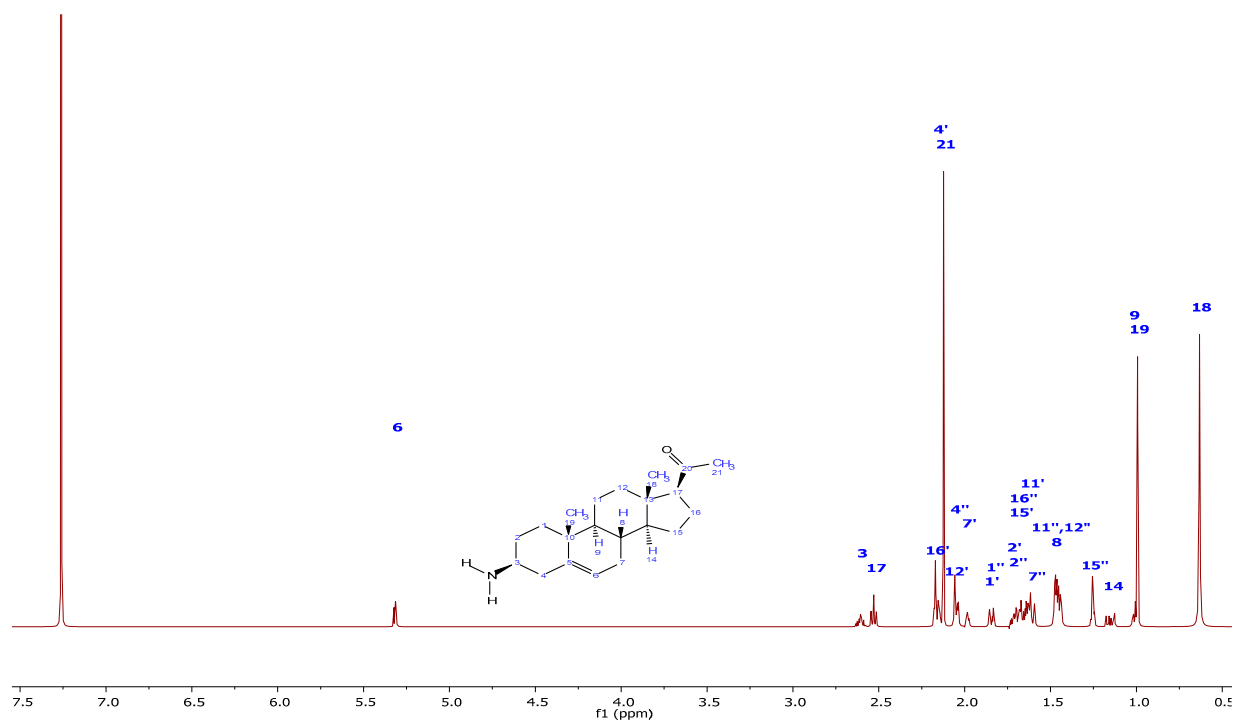

Figure S2:  $^1\text{H}$  NMR spectrum of compound 1 ( $\text{CDCl}_3$ , 600 MHz)

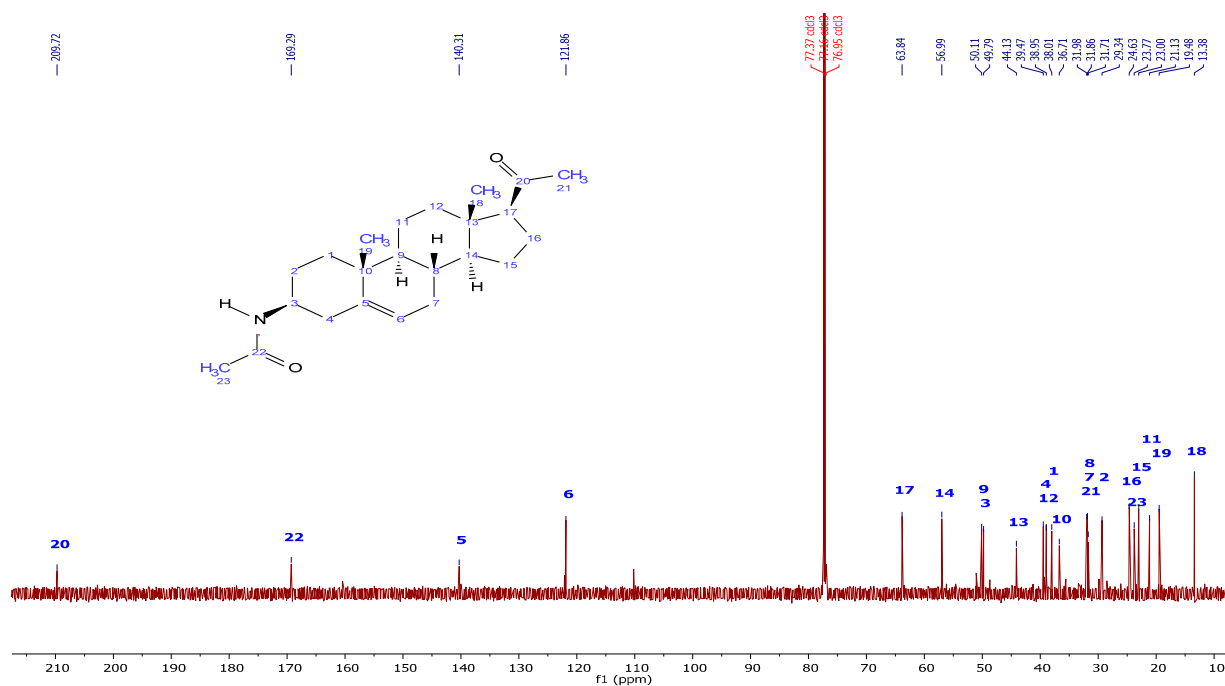

**Figure S3:** <sup>13</sup>C NMR spectrum of compound **2** (CDCl<sub>3</sub>, 600 MHz)

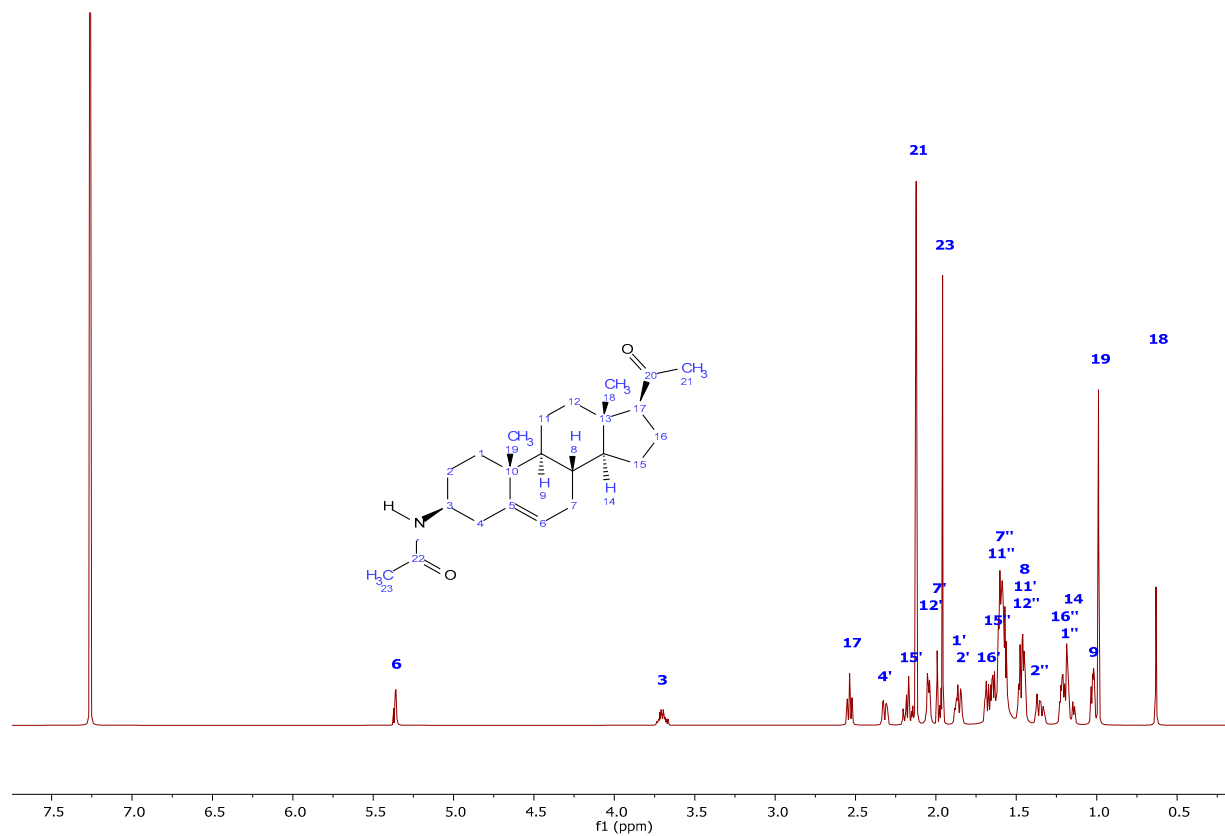

**Figure S4:** <sup>1</sup>H NMR spectrum of compound **2** (CDCl<sub>3</sub>, 600 MHz)

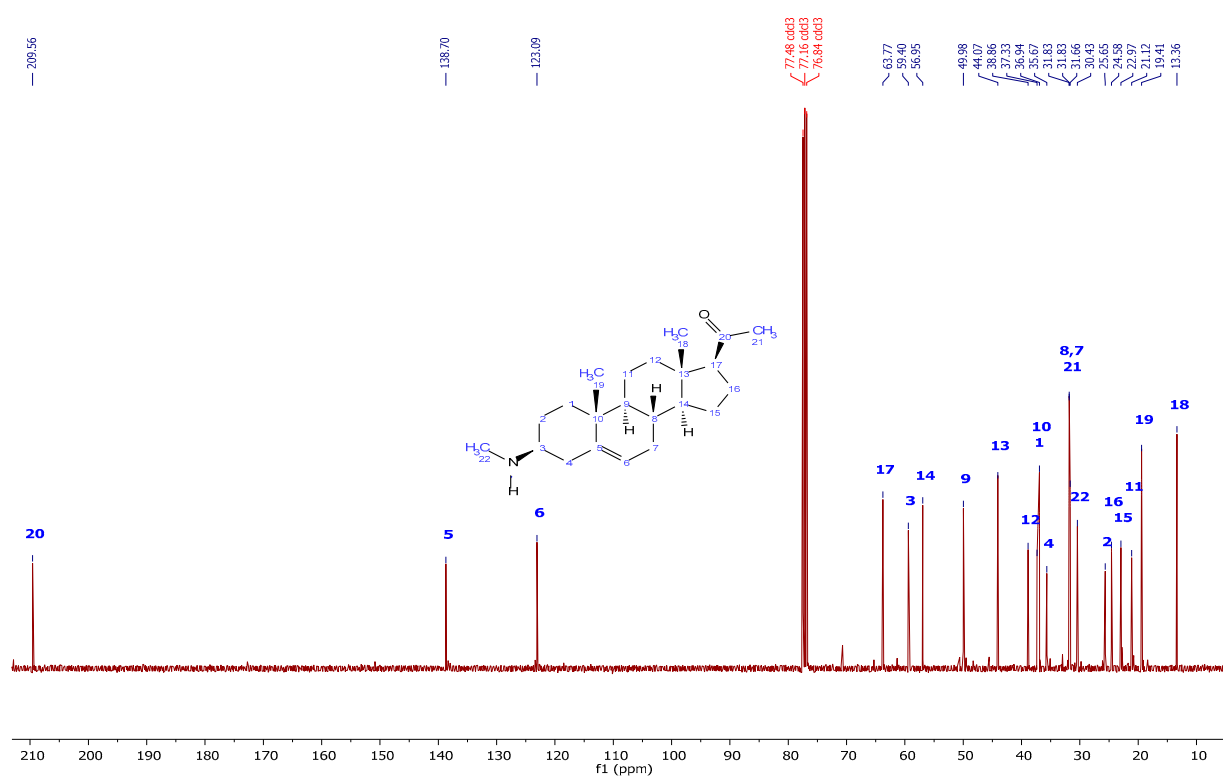

Figure S5:  $^{13}\text{C}$  NMR spectrum of compound **3** ( $\text{CDCl}_3$ , 600 MHz)

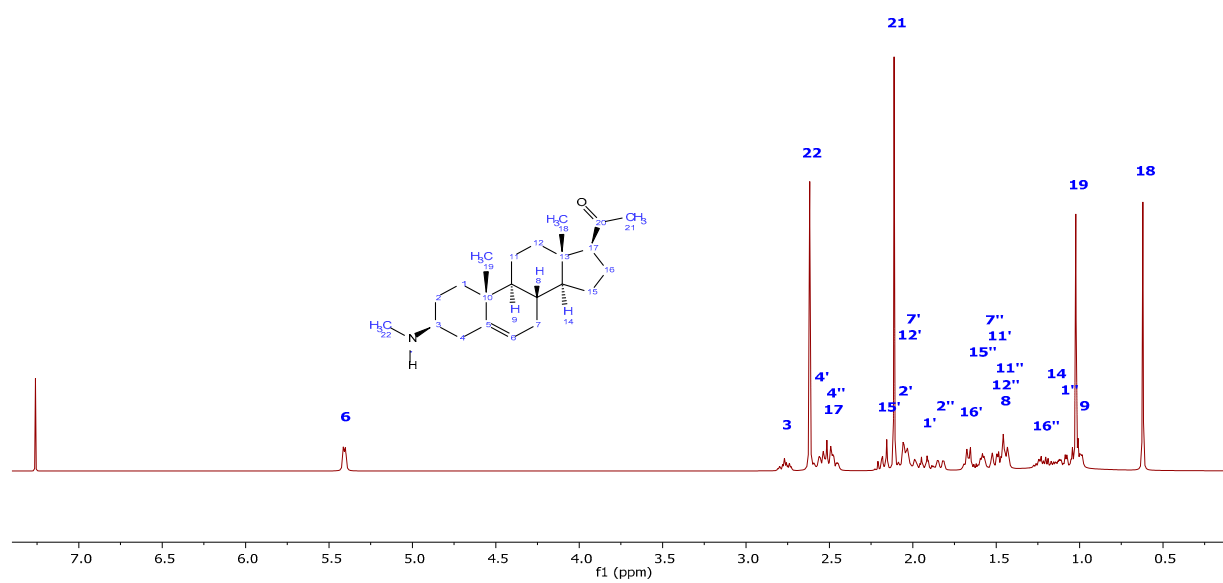

Figure S6:  $^1\text{H}$  NMR spectrum of compound **3** ( $\text{CDCl}_3$ , 600 MHz)

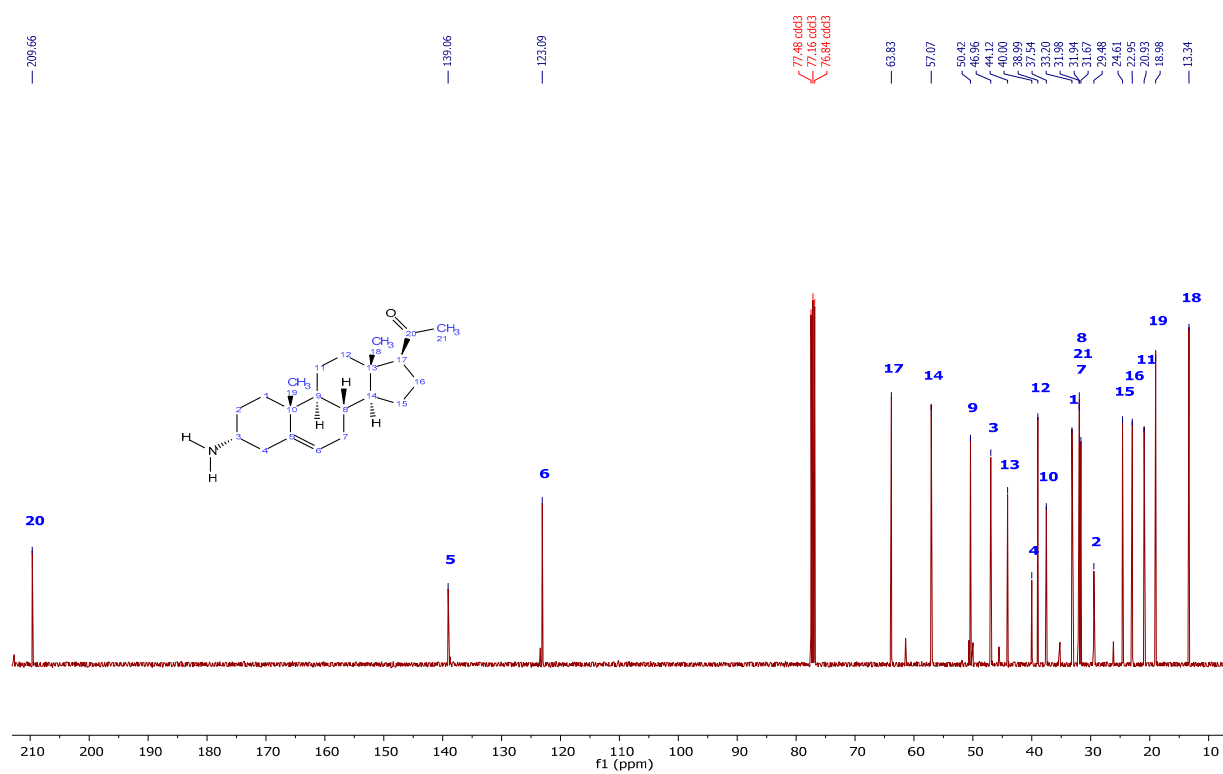

Figure S7:  $^{13}\text{C}$  NMR spectrum of compound 4 ( $\text{CDCl}_3$ , 600 MHz)

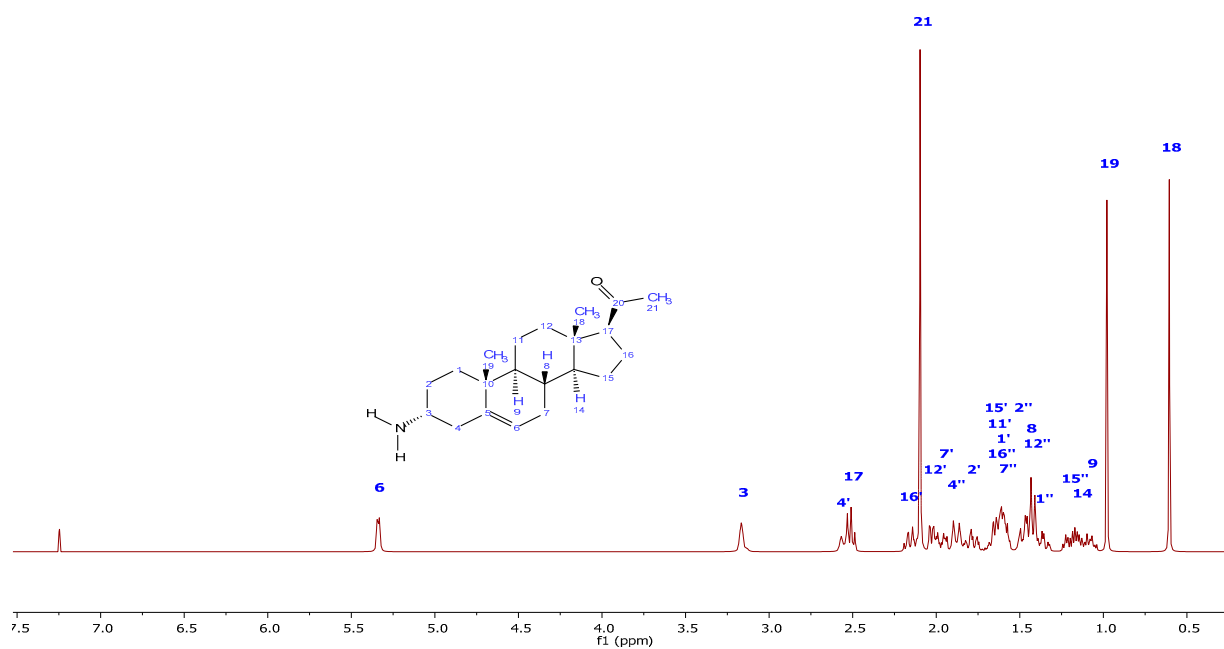

Figure S8:  $^1\text{H}$  NMR spectrum of compound 4 ( $\text{CDCl}_3$ , 600 MHz)

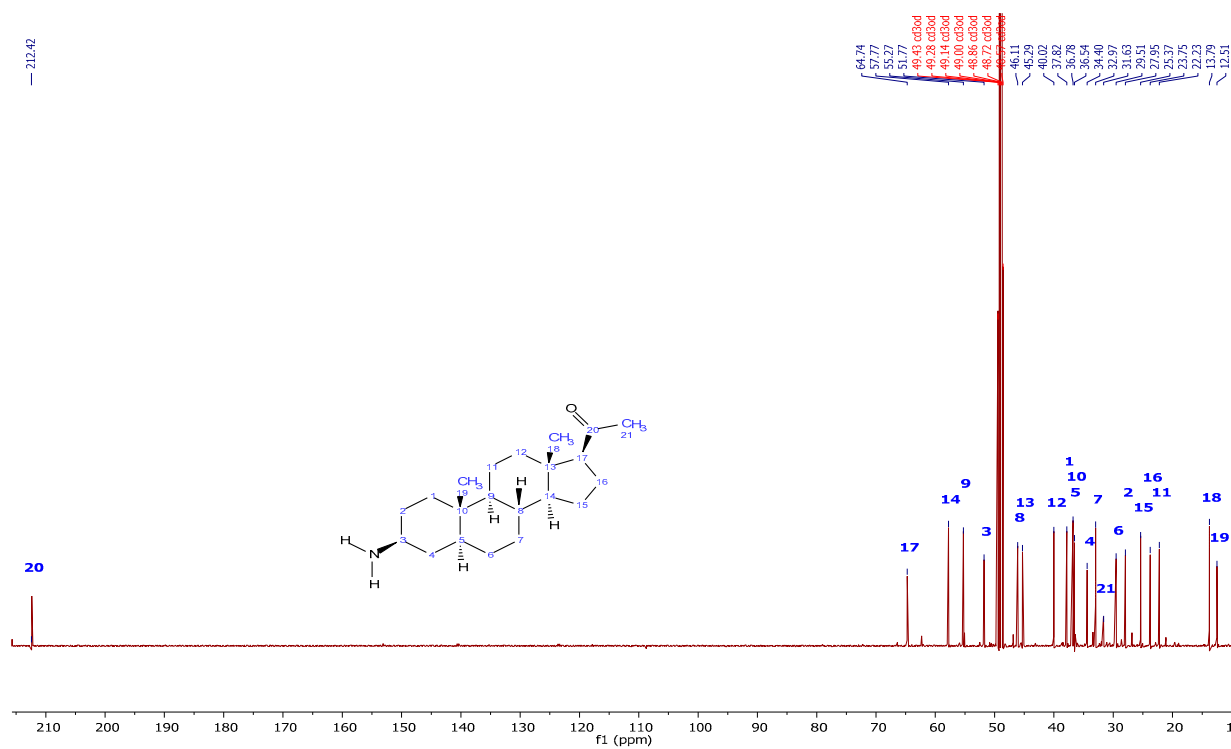

**Figure S9:** <sup>13</sup>C NMR spectrum of compound 5 (CD<sub>3</sub>OD, 600 MHz)

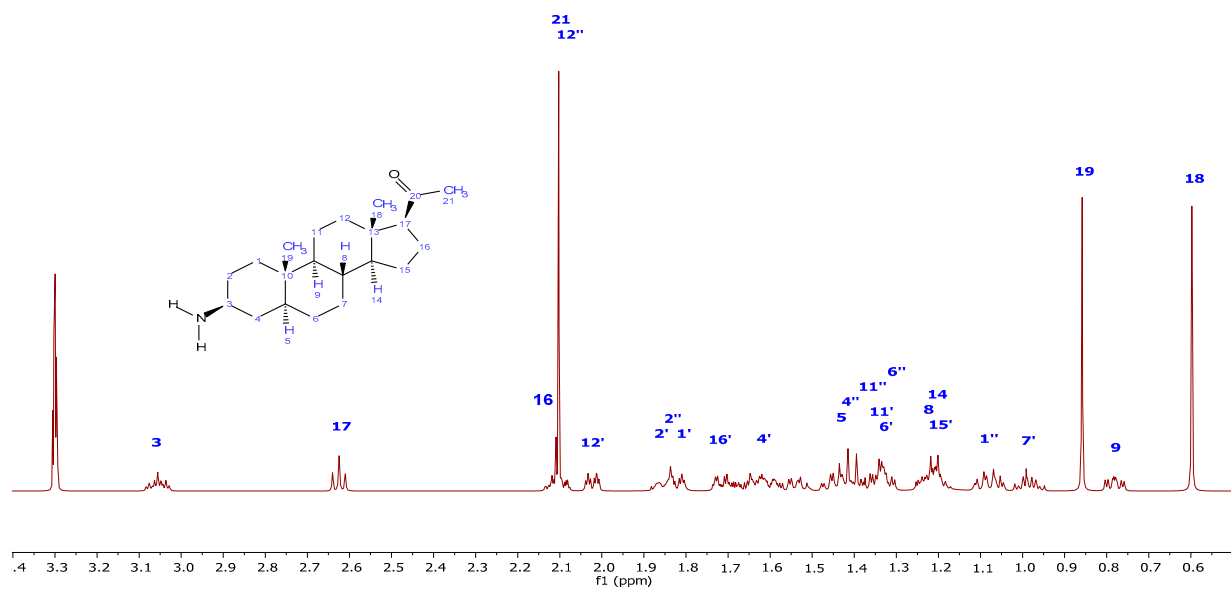

**Figure S10:** <sup>1</sup>H NMR spectrum of compound 5 (CD<sub>3</sub>OD, 600 MHz)

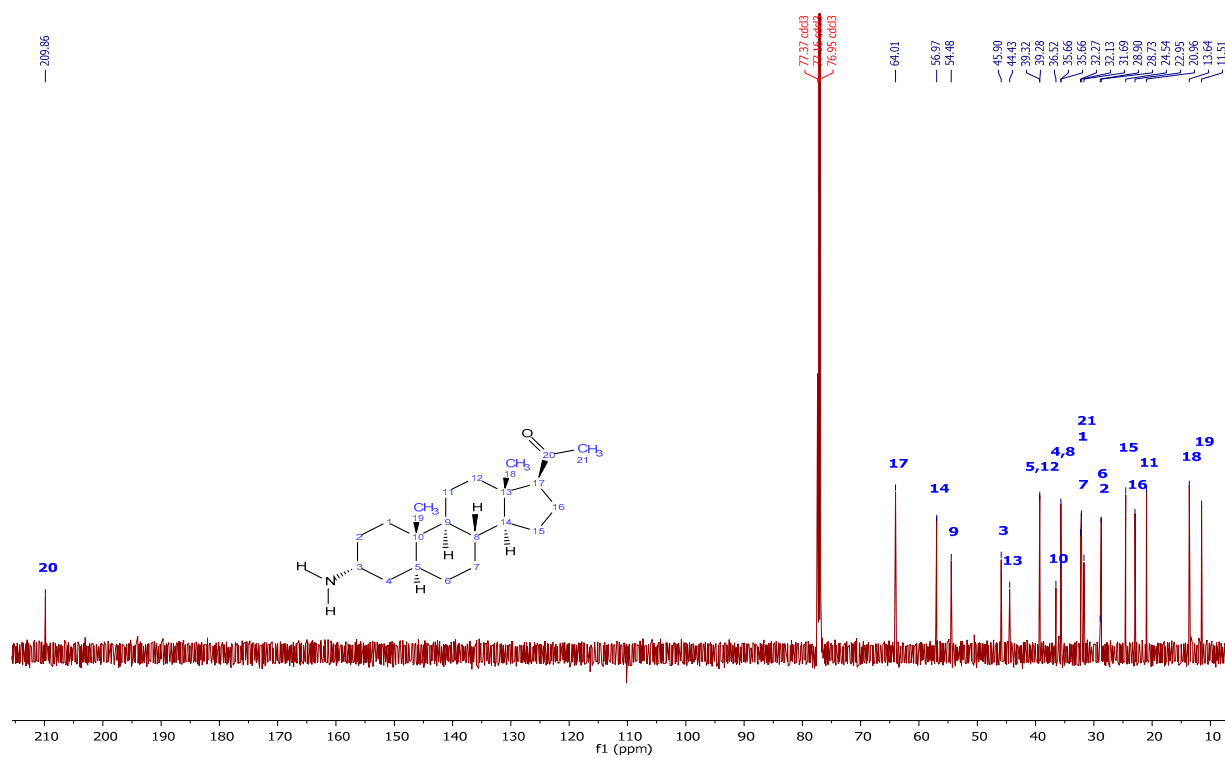

Figure S11: <sup>13</sup>C NMR spectrum of compound **6** (CDCl<sub>3</sub>, 600 MHz)

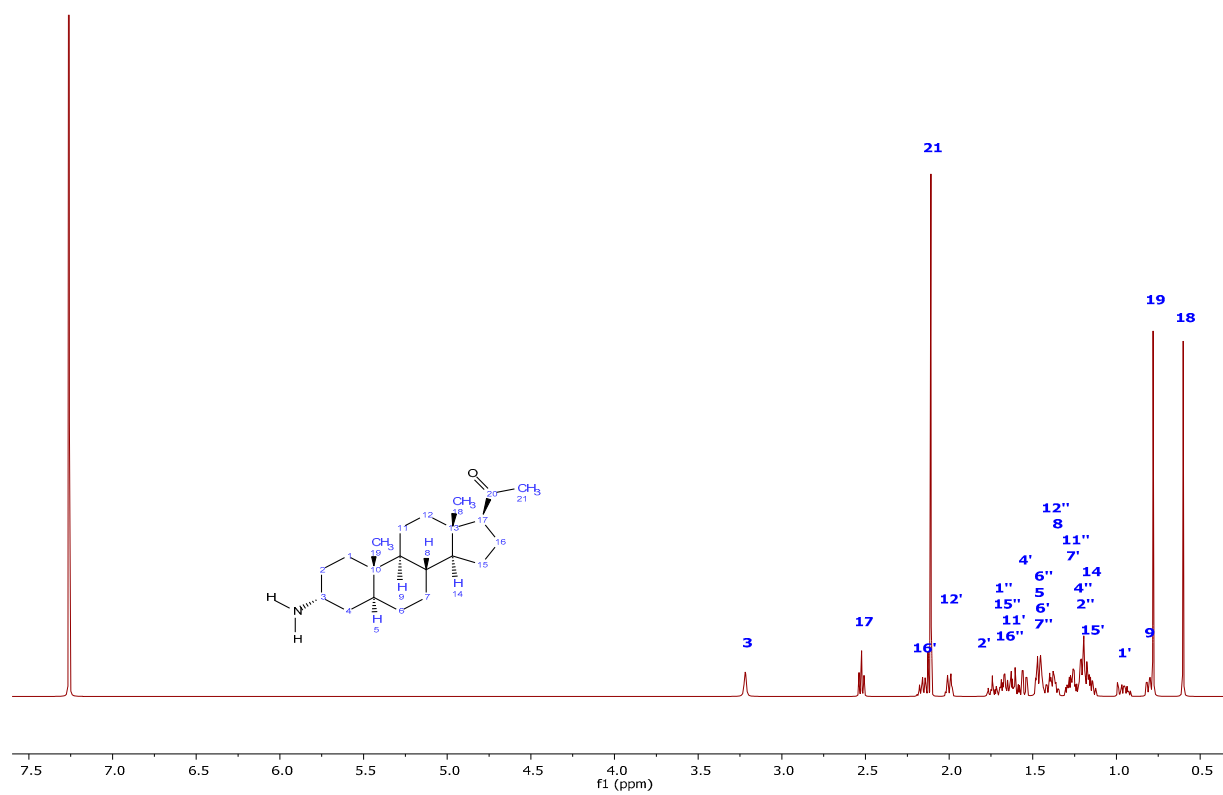

Figure S12: <sup>1</sup>H NMR spectrum of compound **6** (CDCl<sub>3</sub>, 600 MHz)

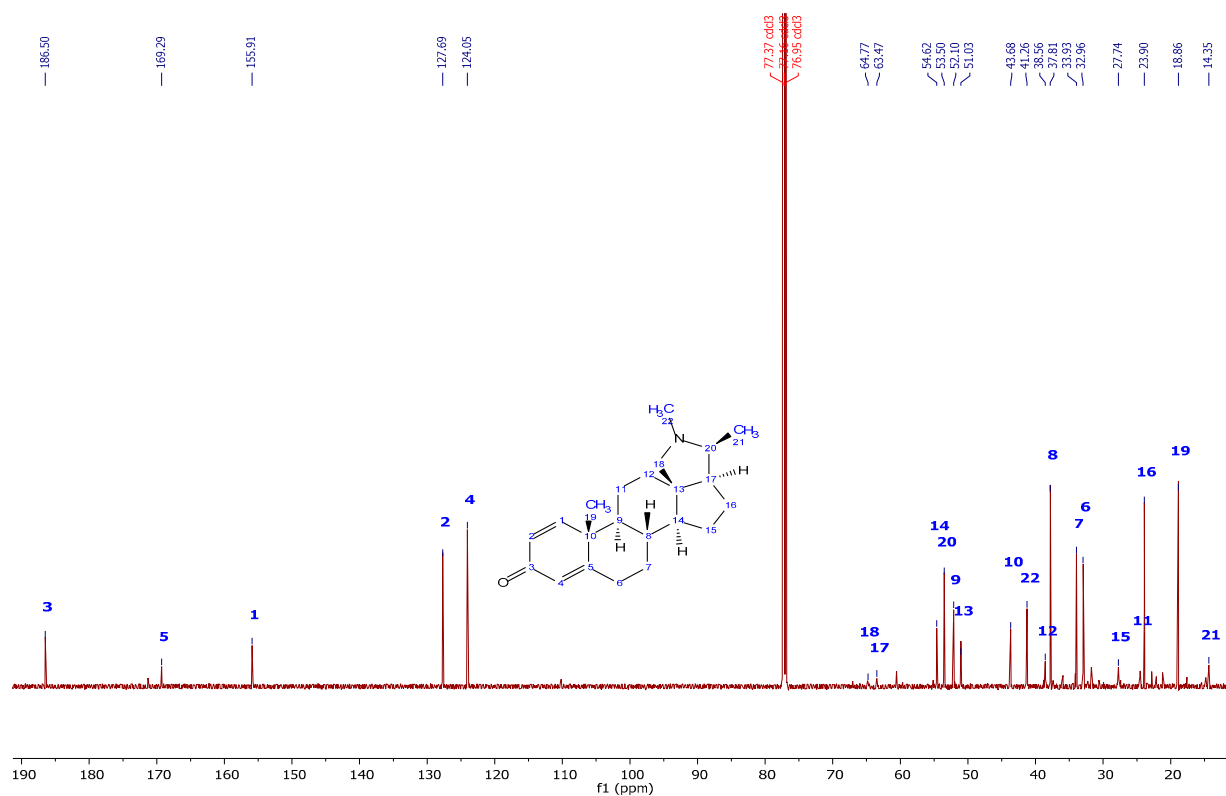

Figure S13:  $^{13}\text{C}$  NMR spectrum of compound 7 (CDCl<sub>3</sub>, 600 MHz)

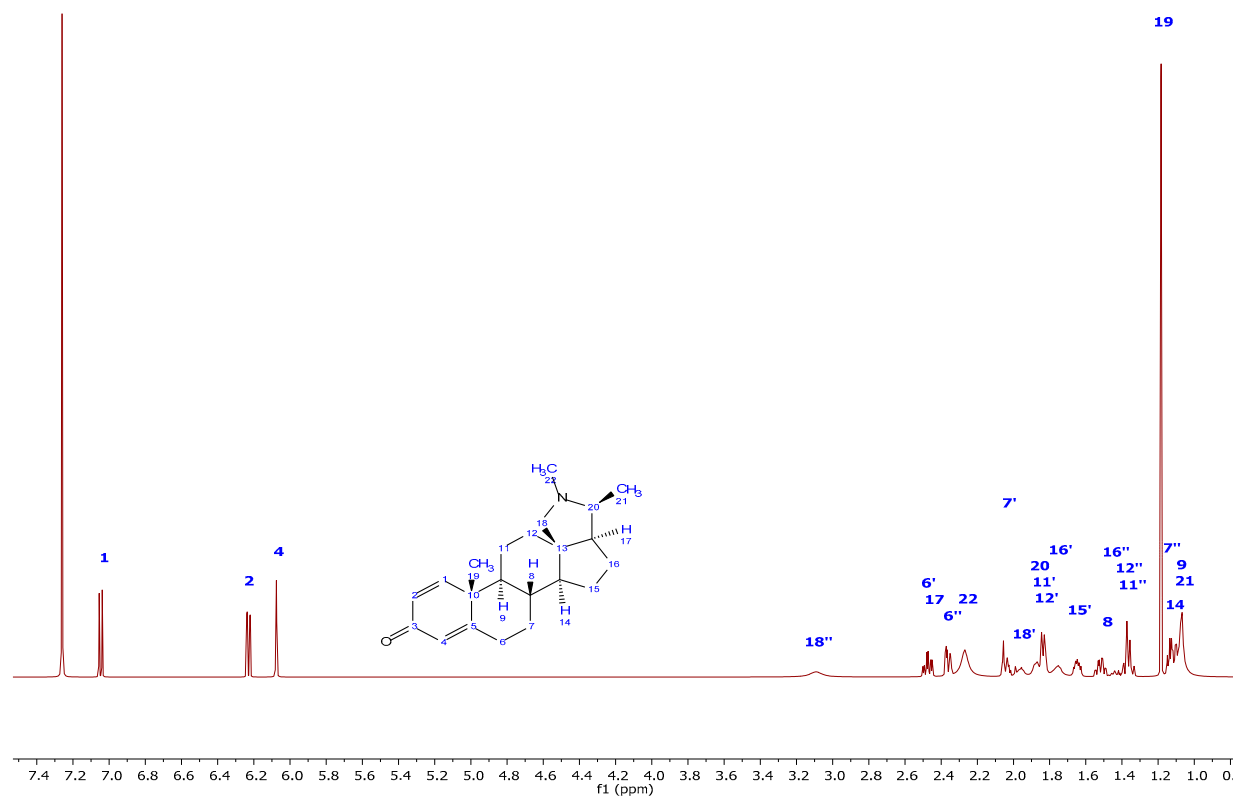

Figure S14:  $^1\text{H}$  NMR spectrum of compound 7 (CDCl<sub>3</sub>, 600 MHz)



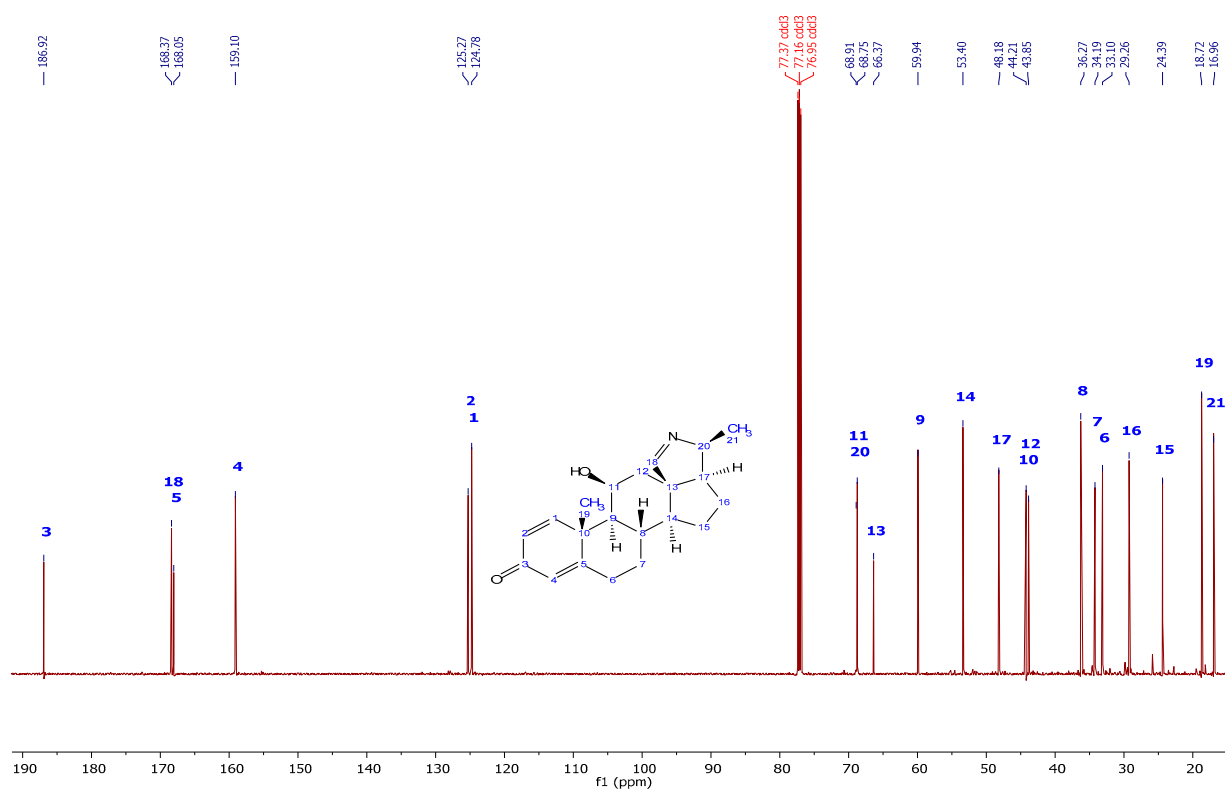

**Figure S15:**  $^{13}\text{C}$  NMR spectrum of compound **8** ( $\text{CDCl}_3$ , 600 MHz)

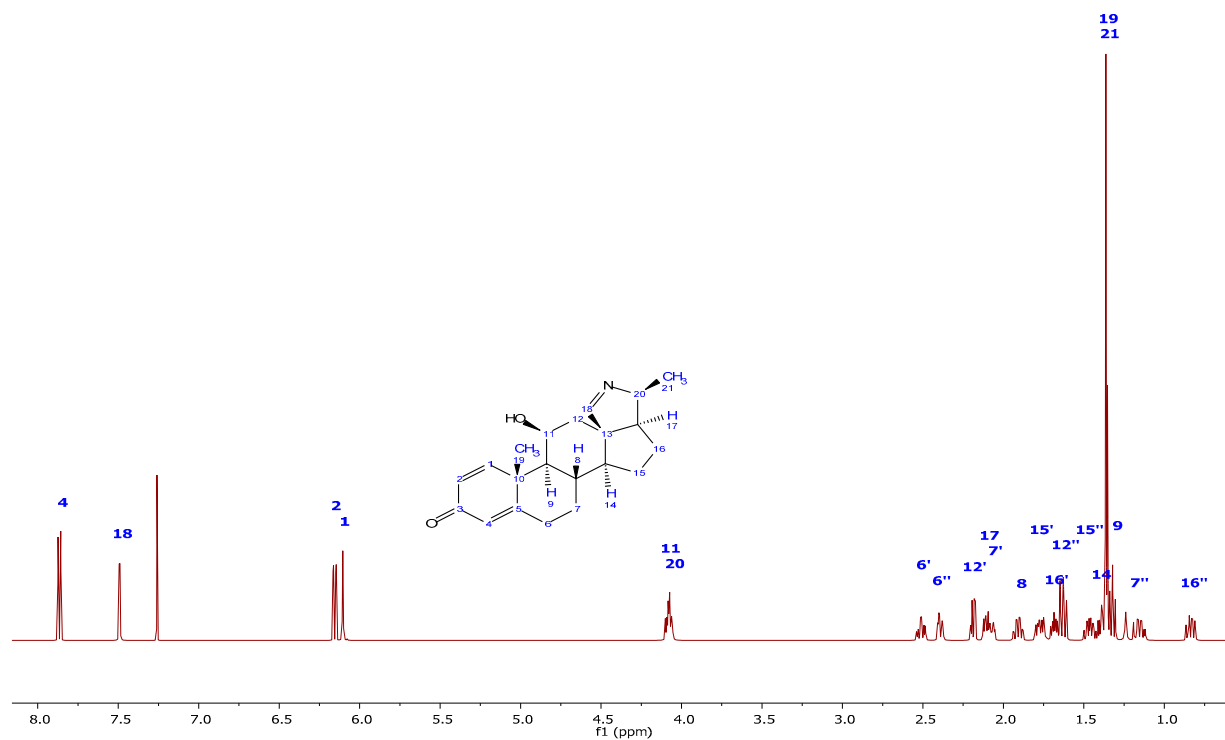

**Figure S16:**  $^1\text{H}$  NMR spectrum of compound **8** ( $\text{CDCl}_3$ , 600 MHz)

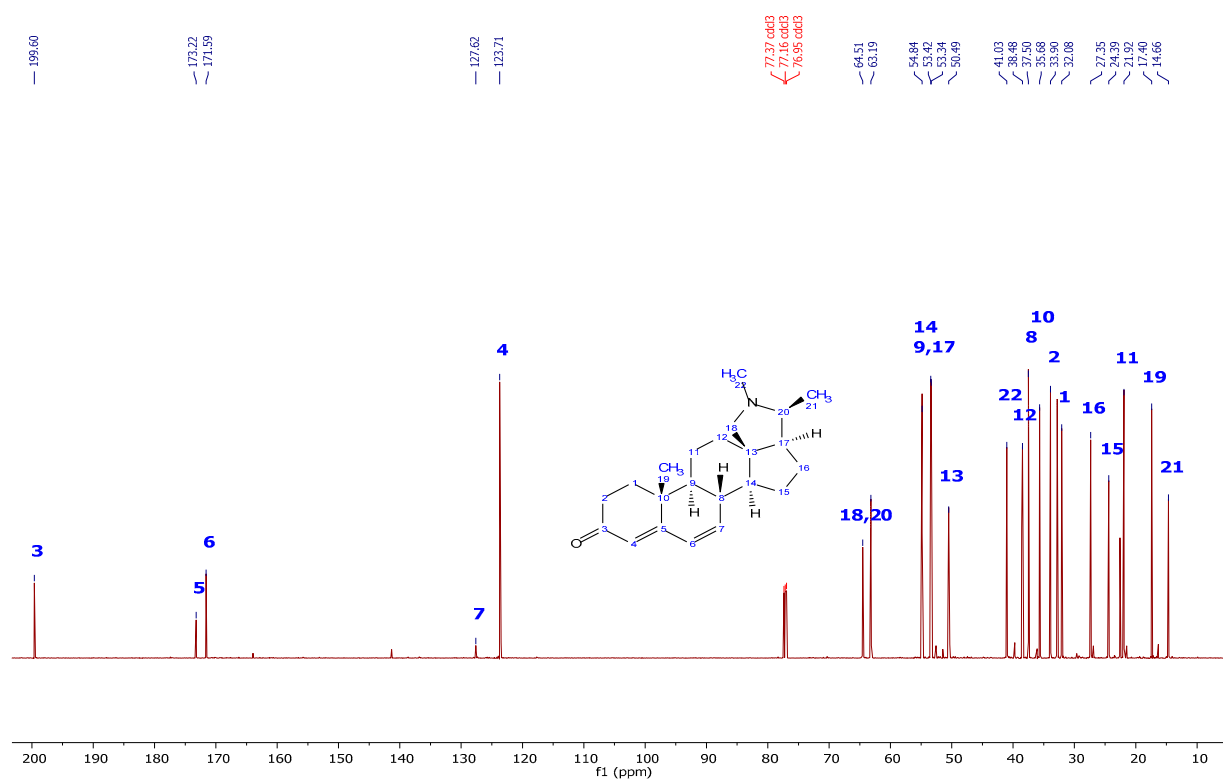

Figure S17:  $^{13}\text{C}$  NMR spectrum of compound **9** ( $\text{CDCl}_3$ , 600 MHz)

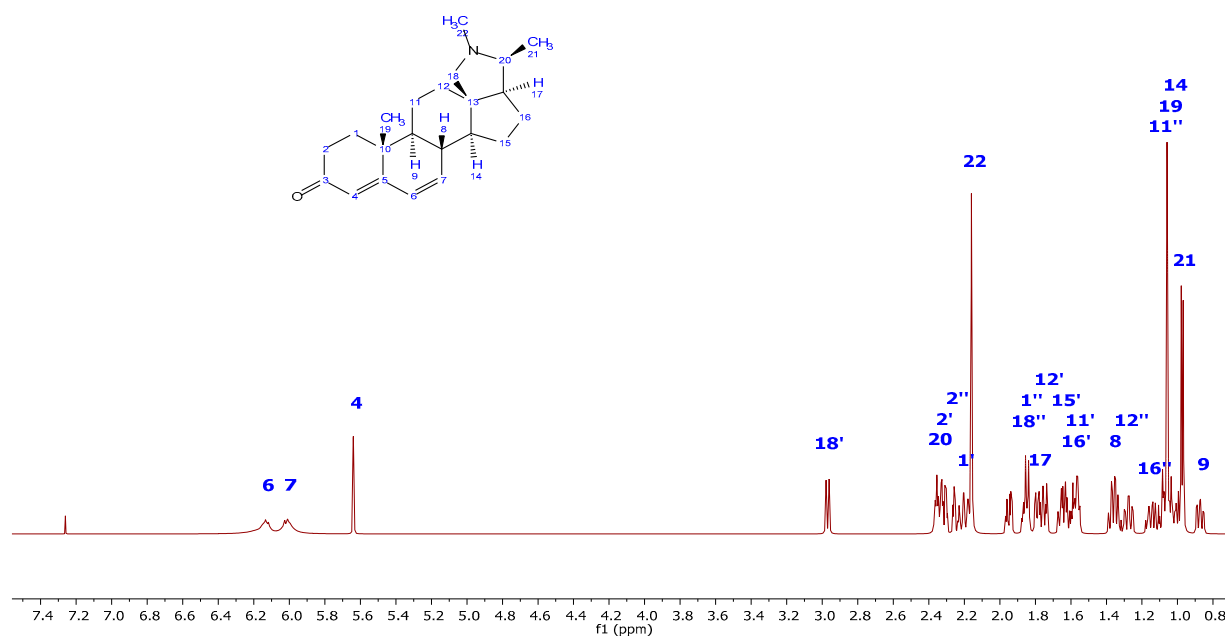

Figure S18:  $^1\text{H}$  NMR spectrum of compound **9** ( $\text{CDCl}_3$ , 600 MHz)

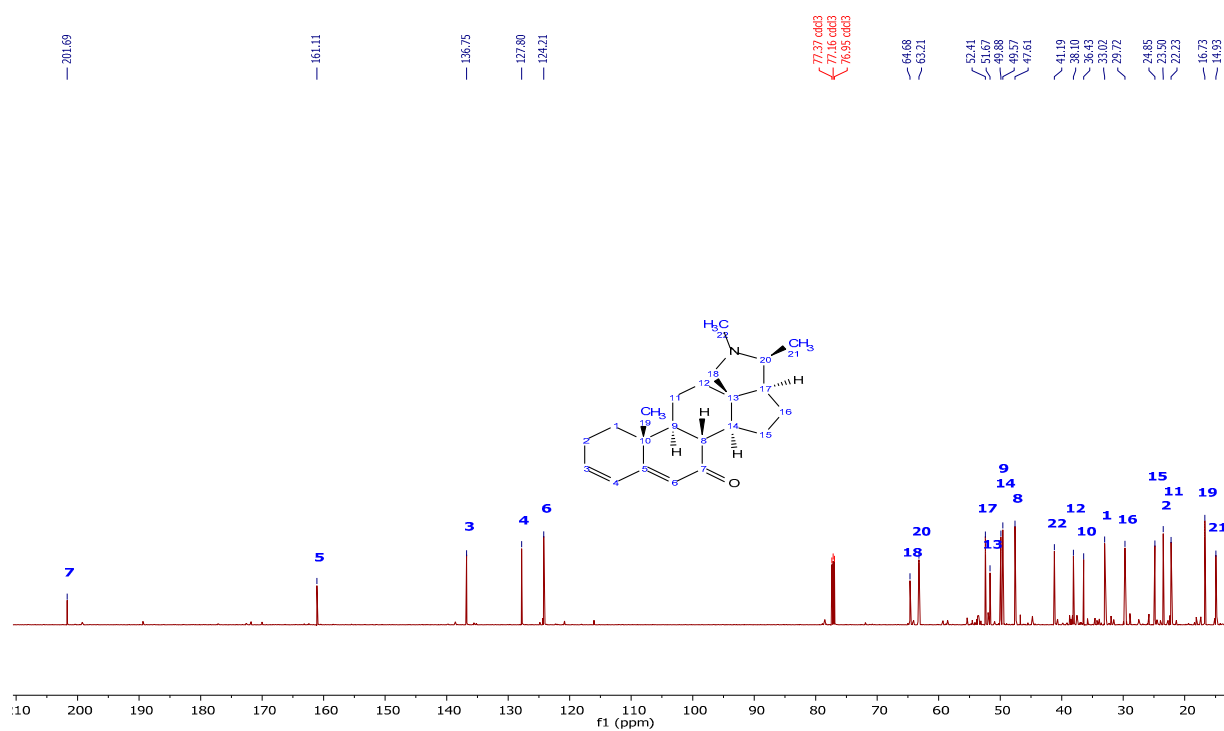

**Figure S19:**  $^{13}\text{C}$  NMR spectrum of compound **10** ( $\text{CDCl}_3$ , 600 MHz)

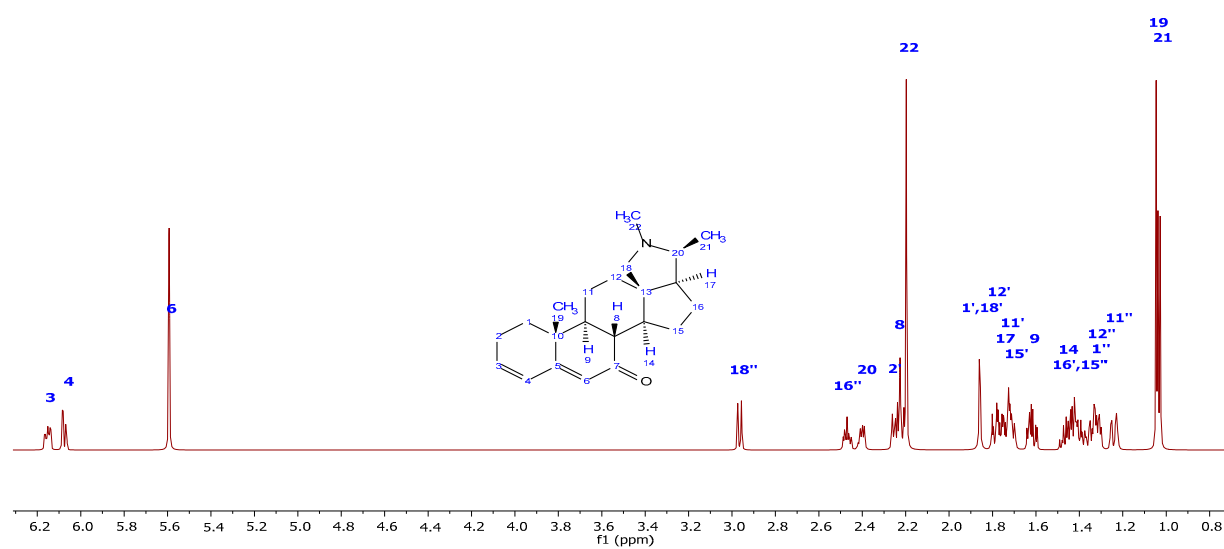

**Figure S20:**  $^1\text{H}$  NMR spectrum of compound **10** ( $\text{CDCl}_3$ , 600 MHz)

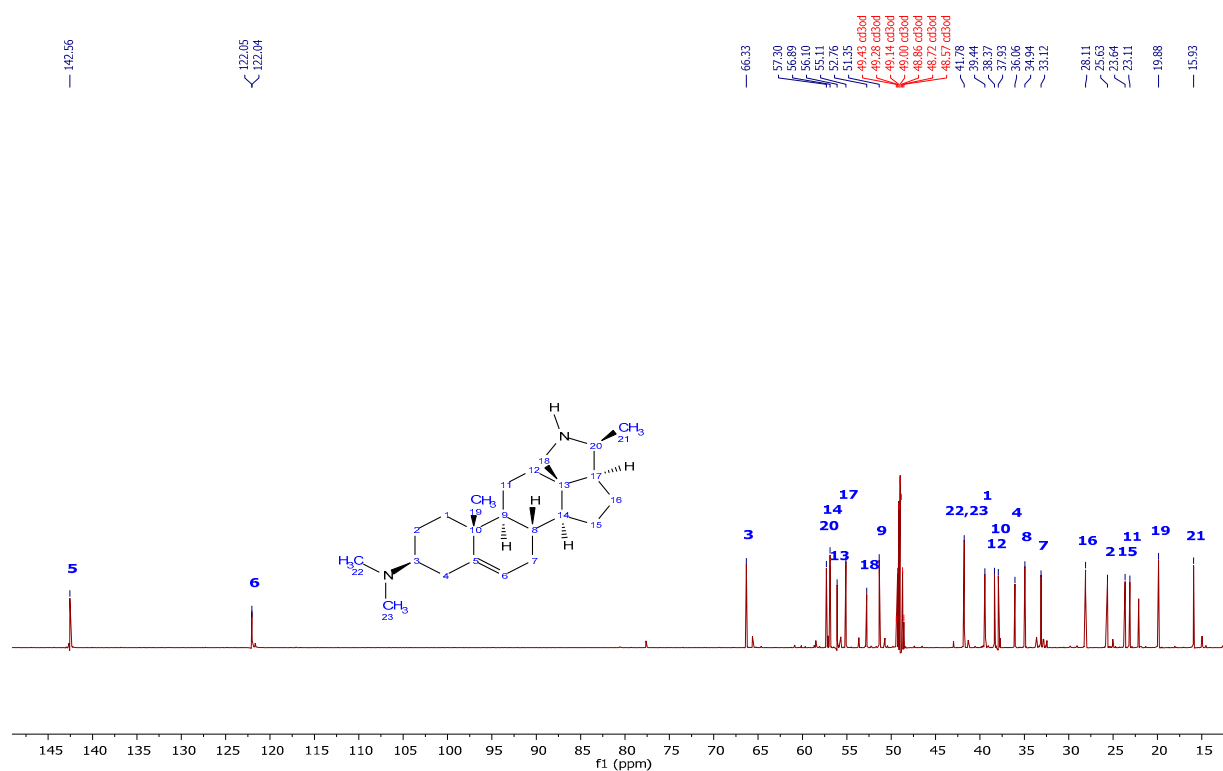

Figure S21:  $^{13}\text{C}$  NMR spectrum of compound 11 ( $\text{CD}_3\text{OD}$ , 600 MHz)

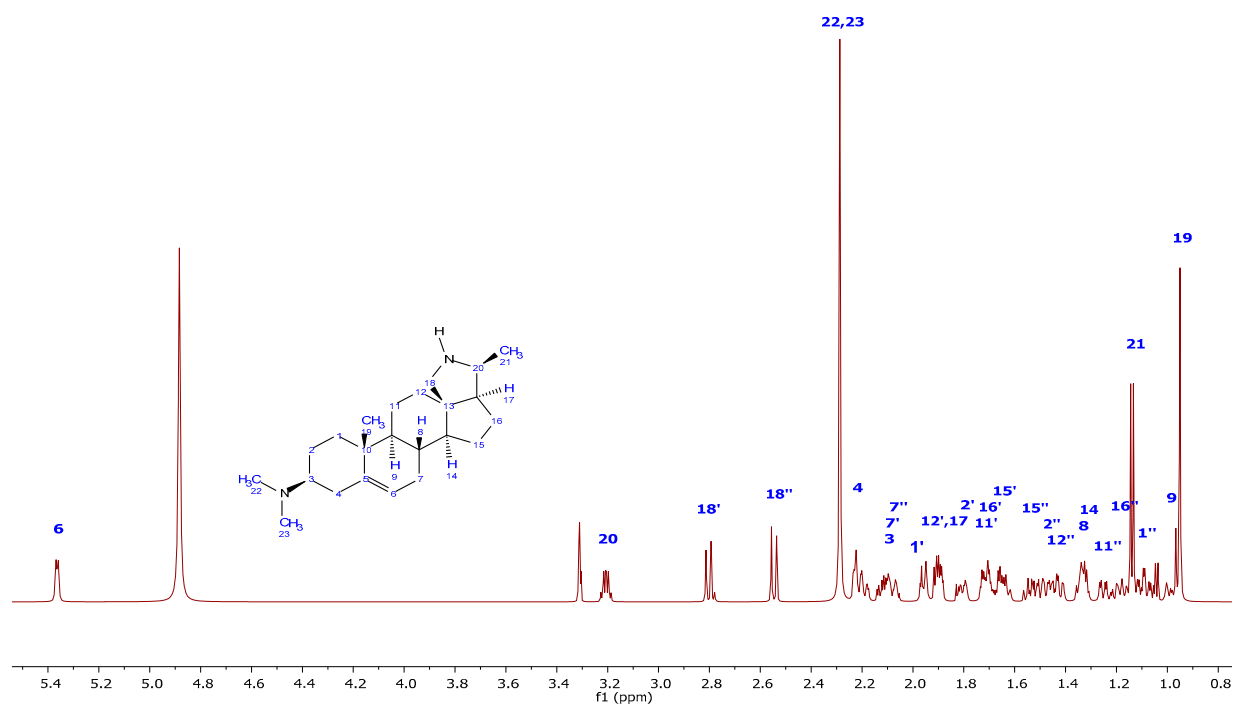

Figure S22:  $^1\text{H}$  NMR spectrum of compound 11 ( $\text{CDCl}_3$ , 600 MHz)

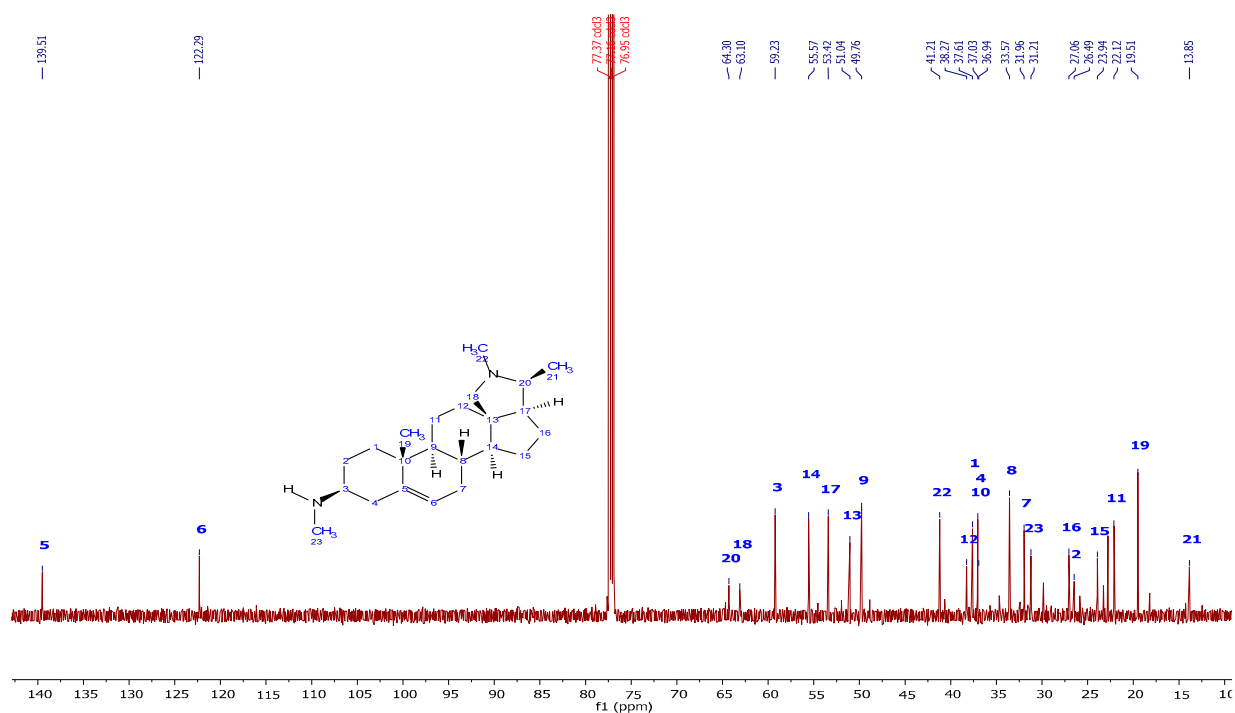

Figure S23:  $^{13}\text{C}$  NMR spectrum of compound 12 ( $\text{CDCl}_3$ , 600 MHz)

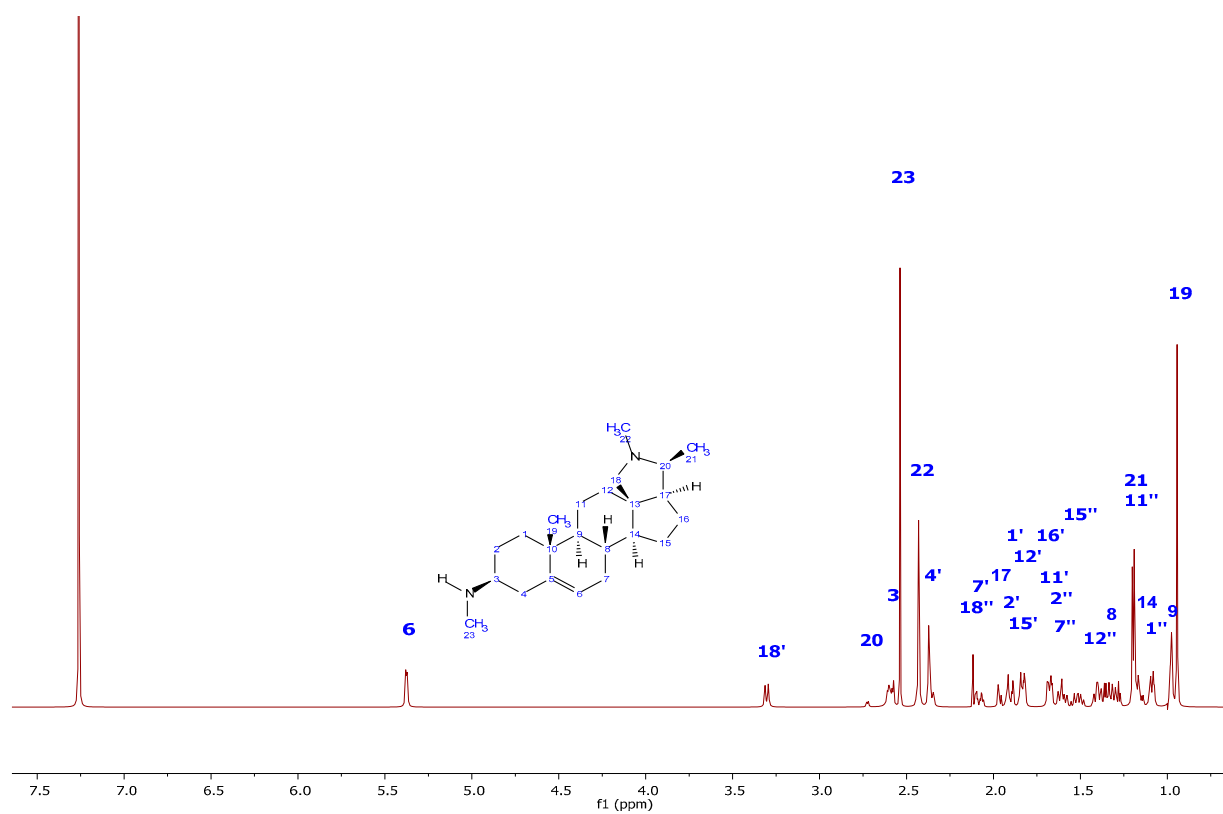

Figure S24:  $^1\text{H}$  NMR spectrum of compound 12 ( $\text{CDCl}_3$ , 600 MHz)

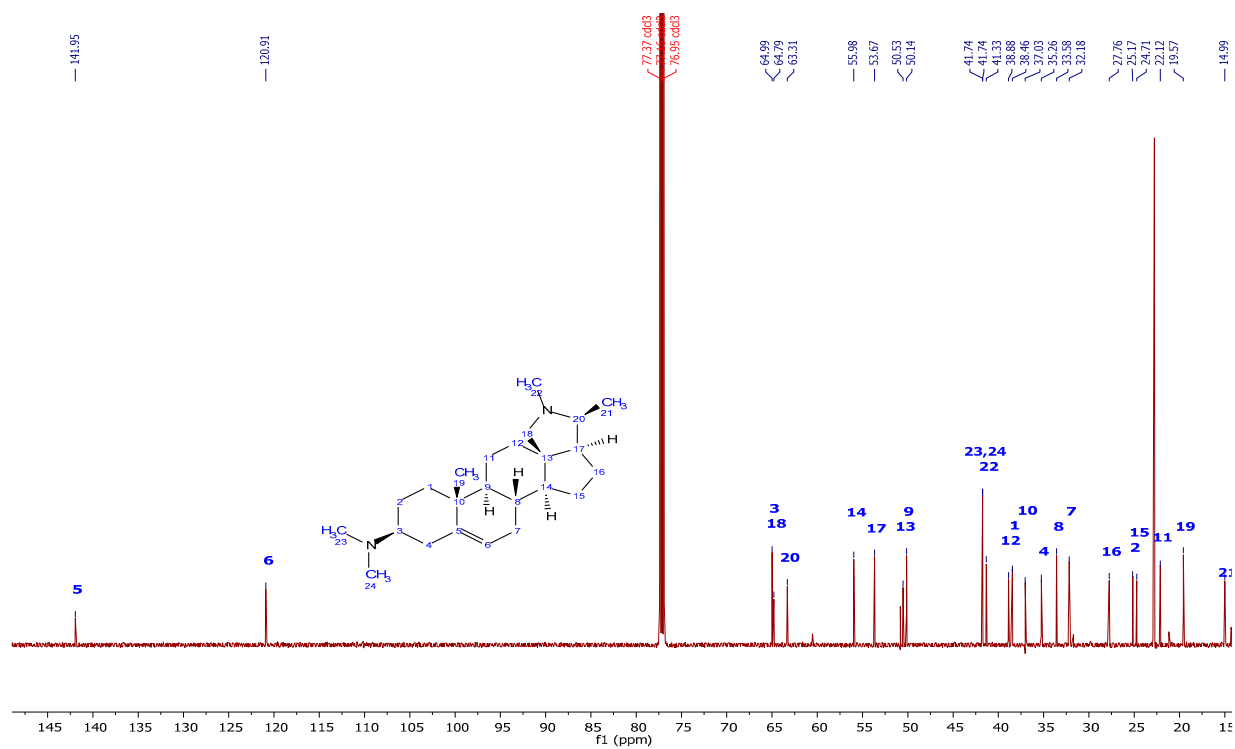

Figure S25:  $^{13}\text{C}$  NMR spectrum of compound **13** ( $\text{CDCl}_3$ , 600 MHz)

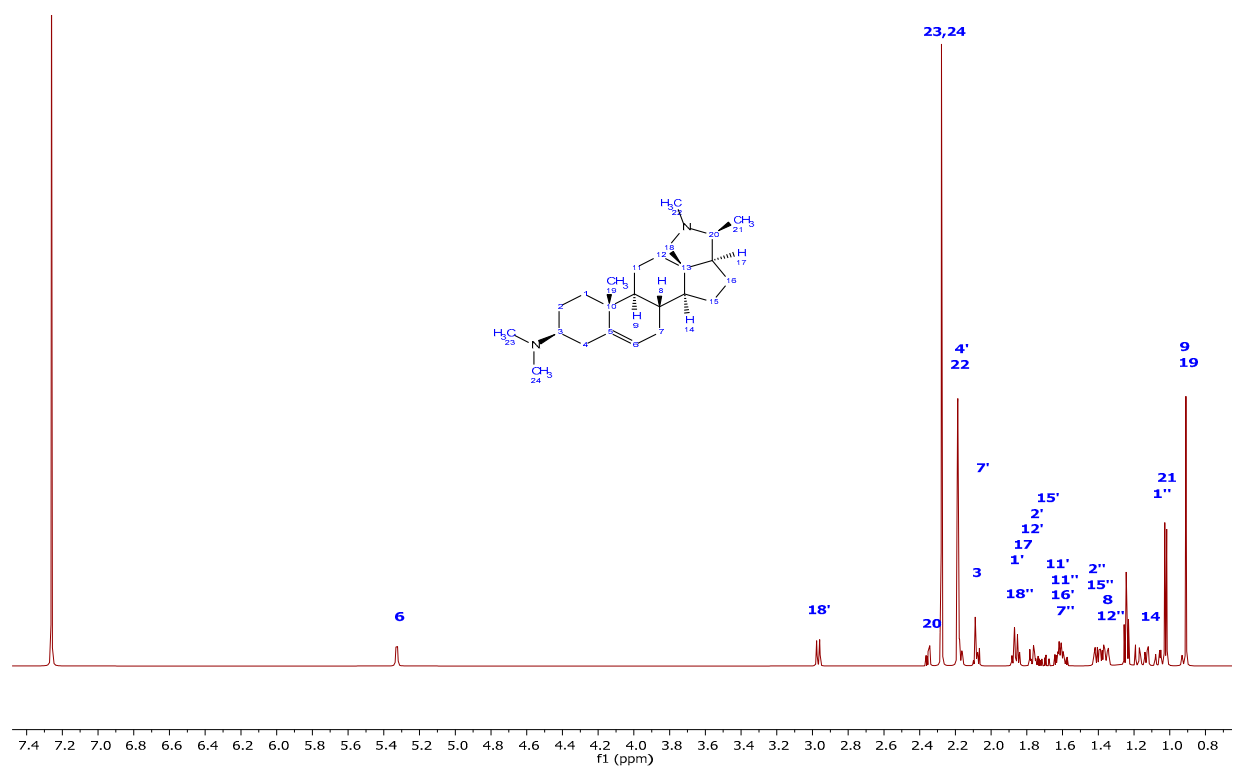

Figure S26:  $^1\text{H}$  NMR spectrum of compound **13** ( $\text{CDCl}_3$ , 600 MHz)

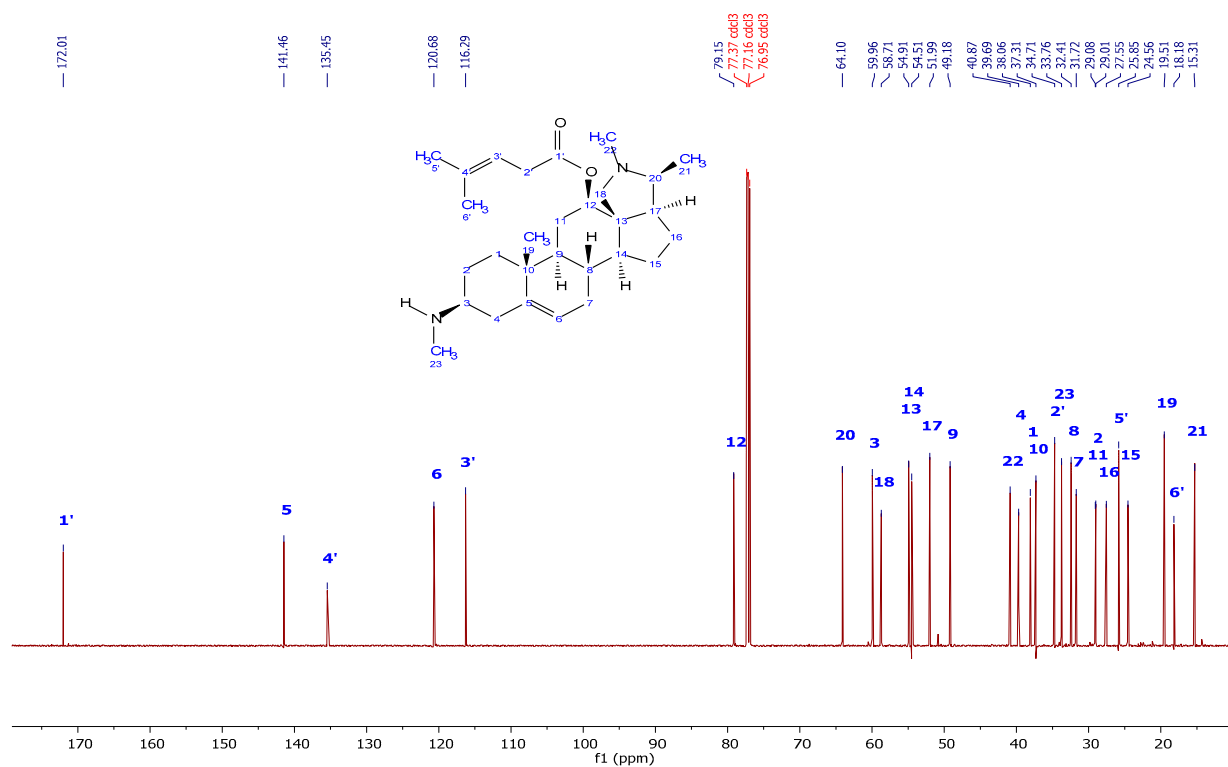

**Figure S27:** <sup>13</sup>C NMR spectrum of compound **14** (CDCl<sub>3</sub>, 600 MHz)

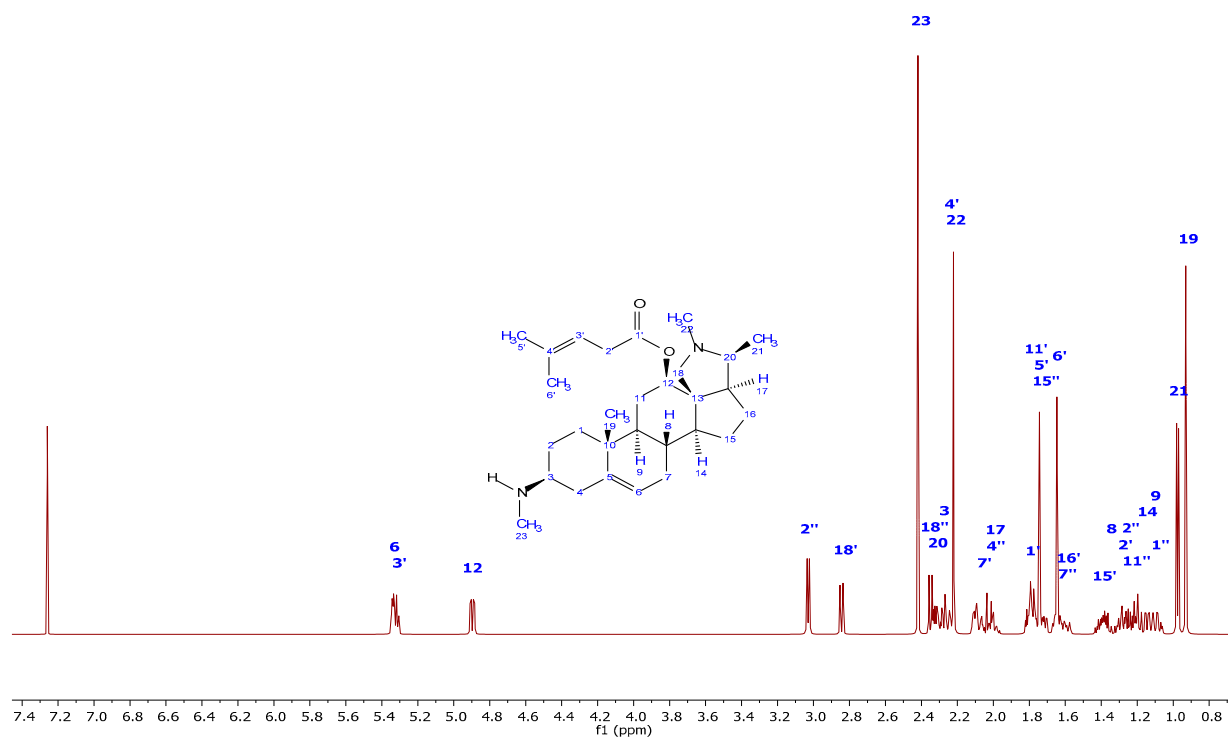

**Figure S28:** <sup>1</sup>H NMR spectrum of compound **14** (CDCl<sub>3</sub>, 600 MHz)

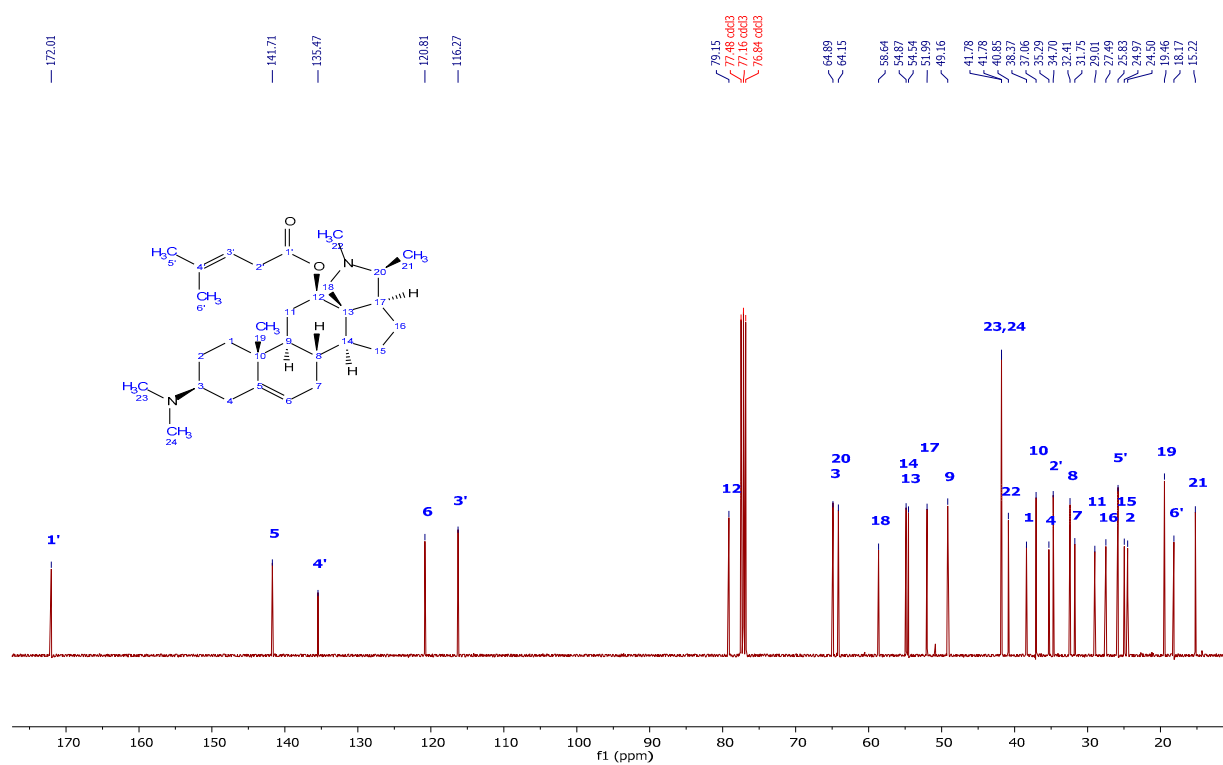

**Figure S29:**  $^{13}\text{C}$  NMR spectrum of compound **15** ( $\text{CDCl}_3$ , 600 MHz)

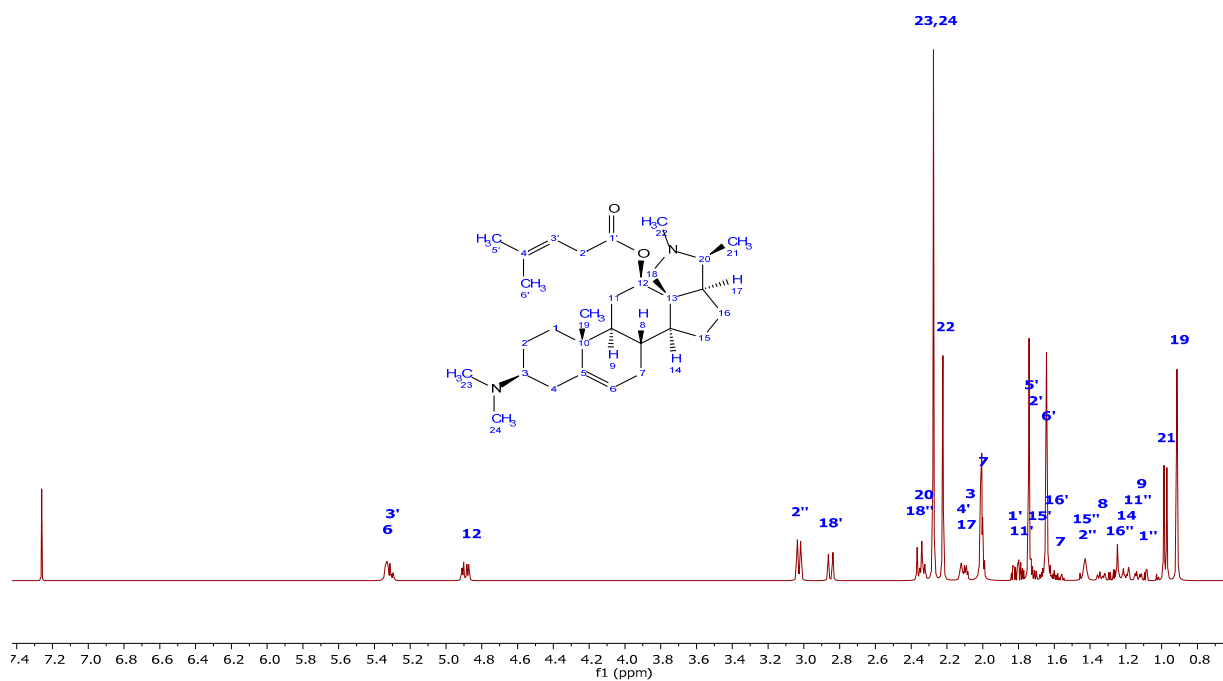

**Figure S30:**  $^1\text{H}$  NMR spectrum of compound **15** ( $\text{CDCl}_3$ , 600 MHz)



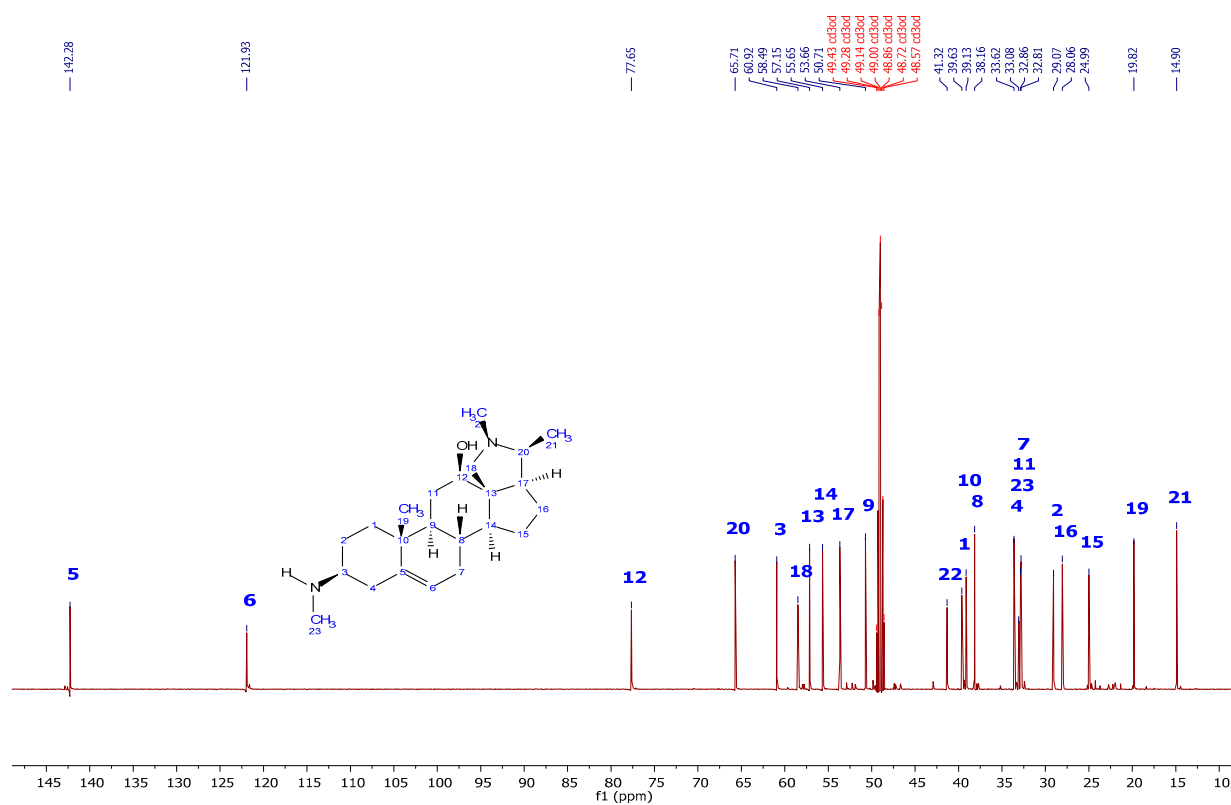

Figure S31:  $^{13}\text{C}$  NMR spectrum of compound 16 ( $\text{CD}_3\text{OD}$ , 600 MHz)

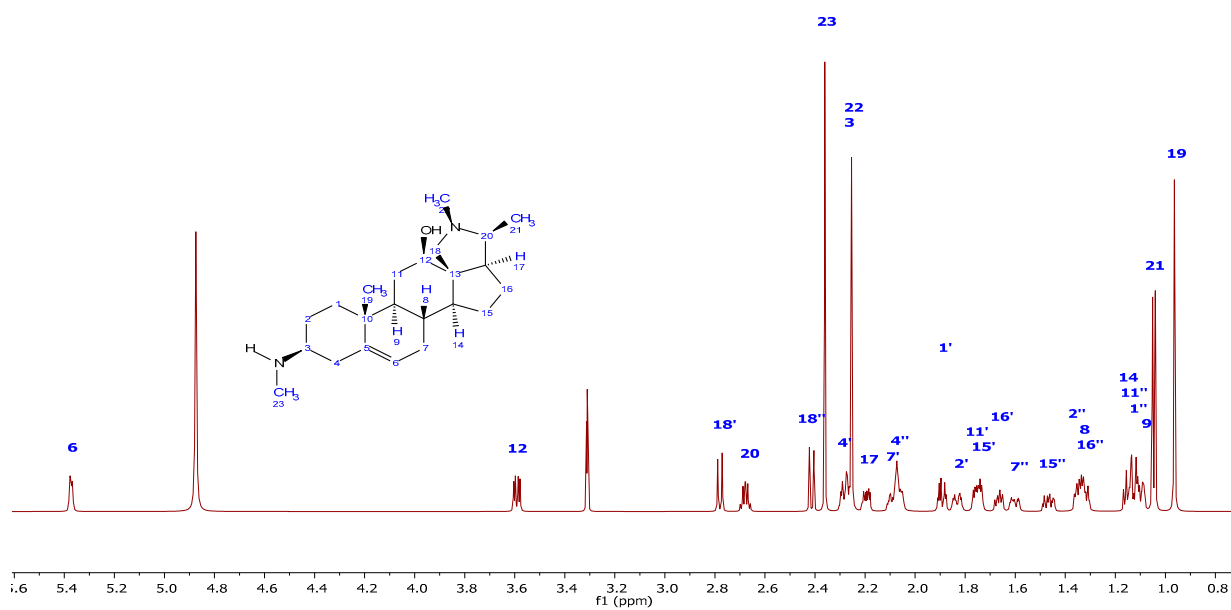

Figure S32:  $^1\text{H}$  NMR spectrum of compound 16 ( $\text{CD}_3\text{OD}$ , 600 MHz)

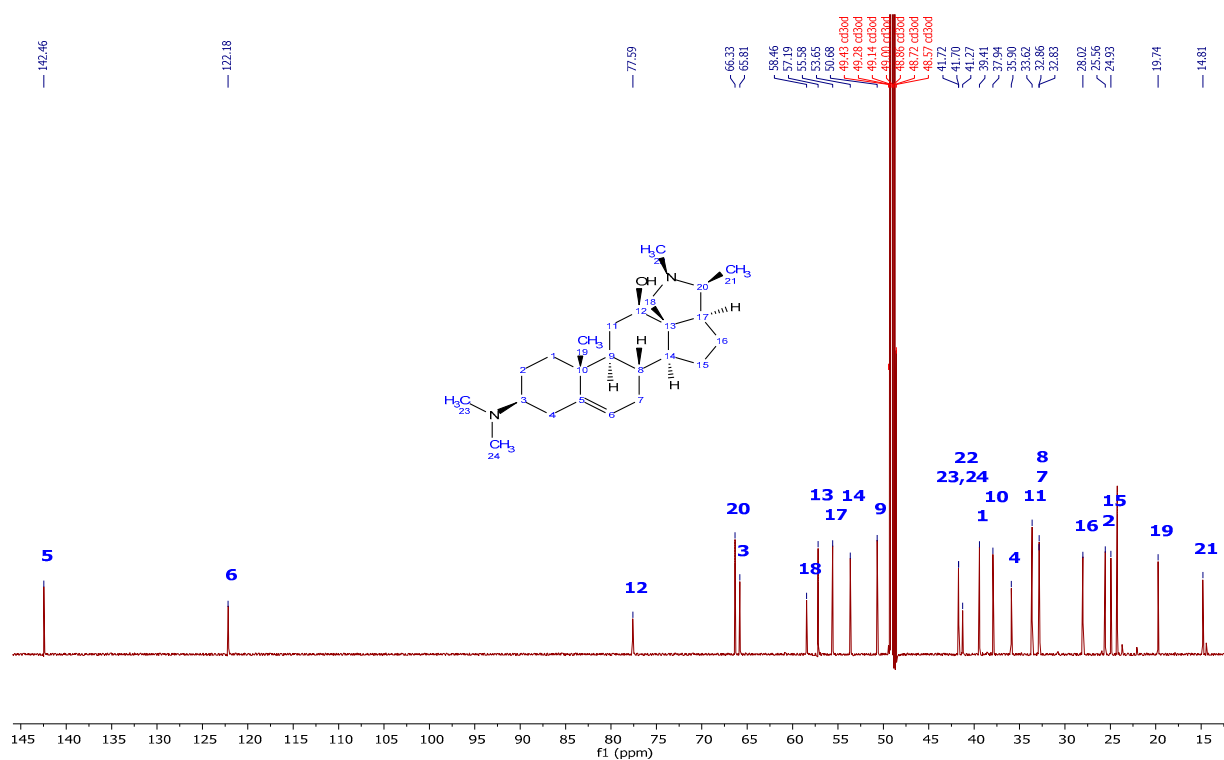

Figure S33:  $^{13}\text{C}$  NMR spectrum of compound 17 ( $\text{CD}_3\text{OD}$ , 600 MHz)

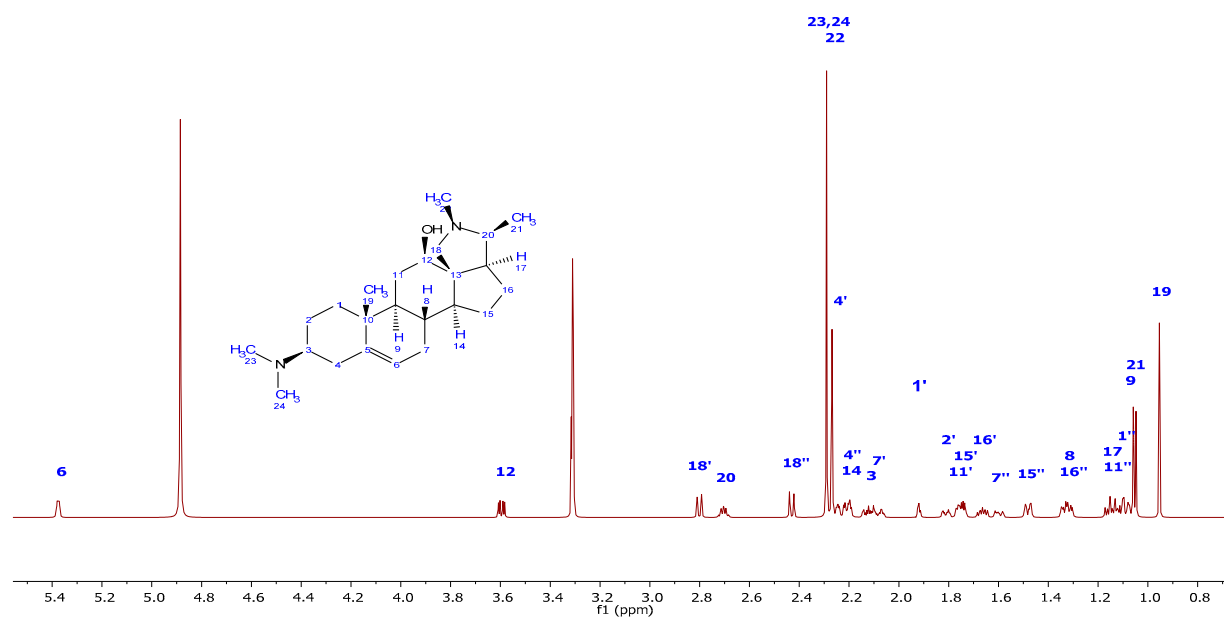

Figure S34:  $^1\text{H}$  NMR spectrum of compound 17 ( $\text{CD}_3\text{OD}$ , 600 MHz)

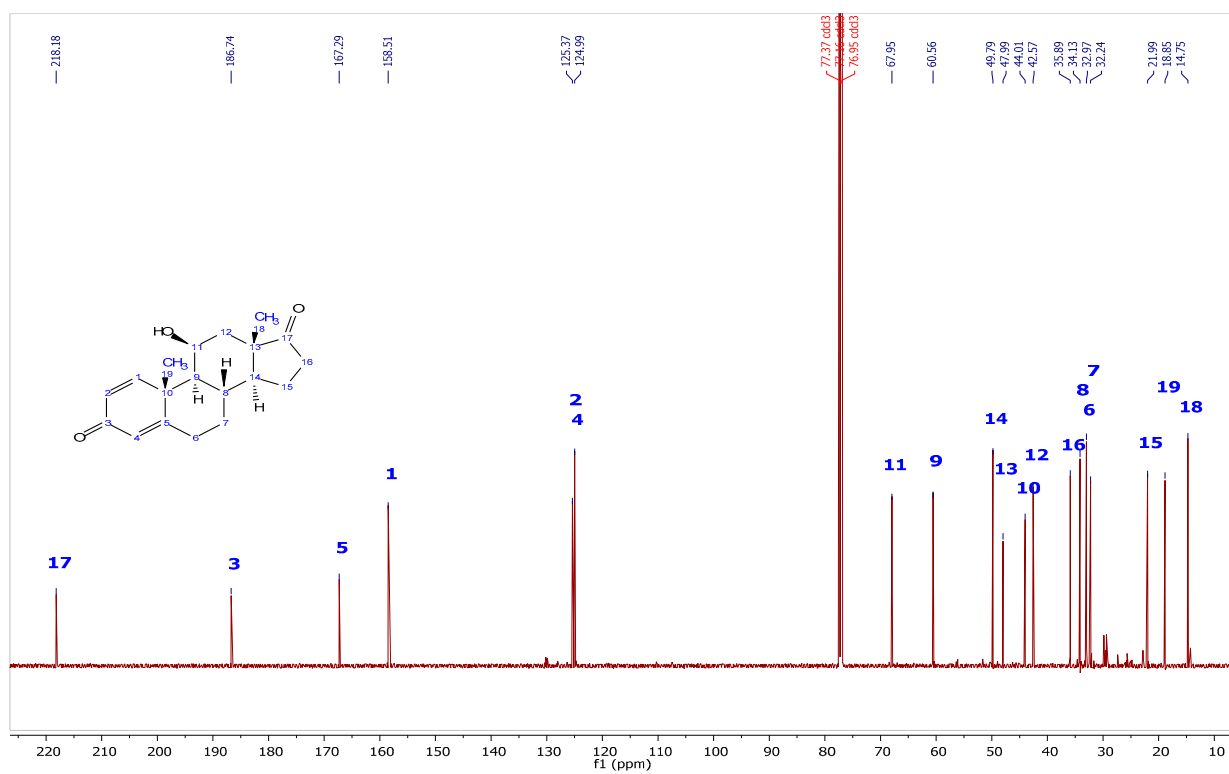

Figure S35:  $^{13}\text{C}$  NMR spectrum of compound **18** ( $\text{CDCl}_3$ , 600 MHz)

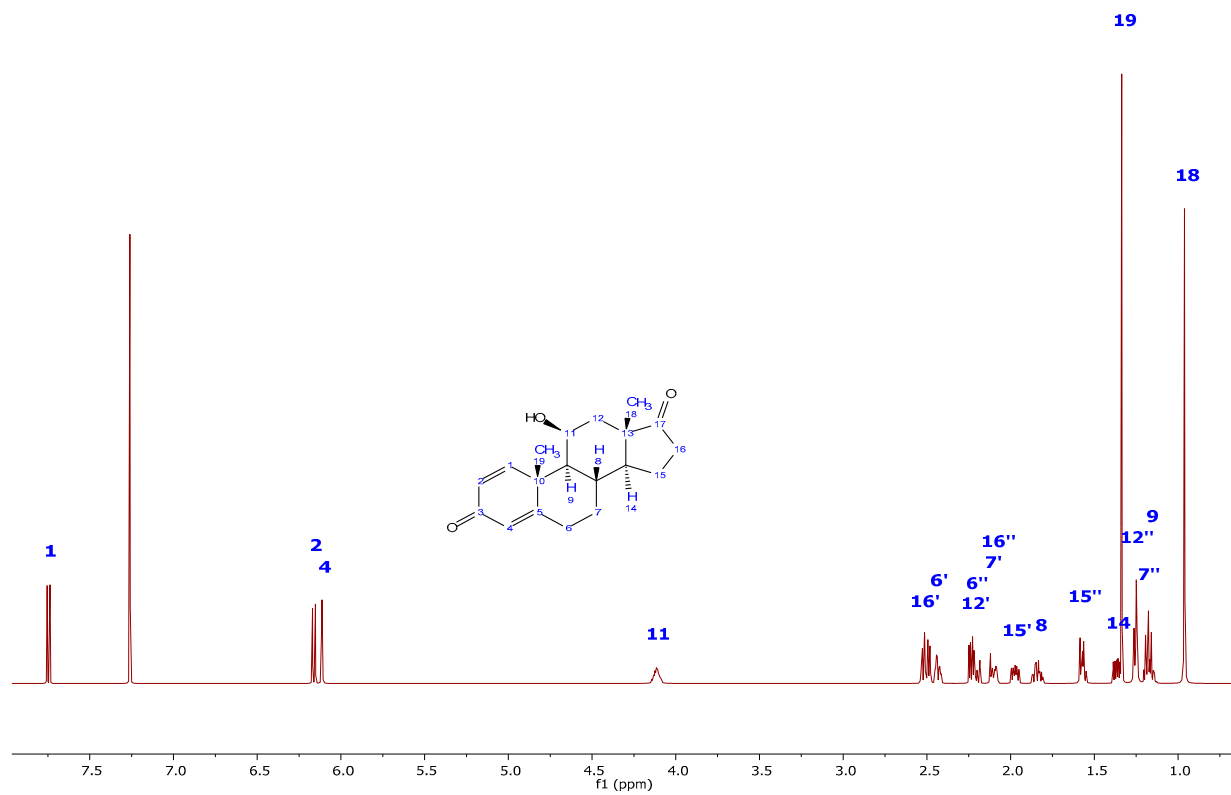

Figure S36:  $^1\text{H}$  NMR spectrum of compound **18** ( $\text{CDCl}_3$ , 600 MHz)

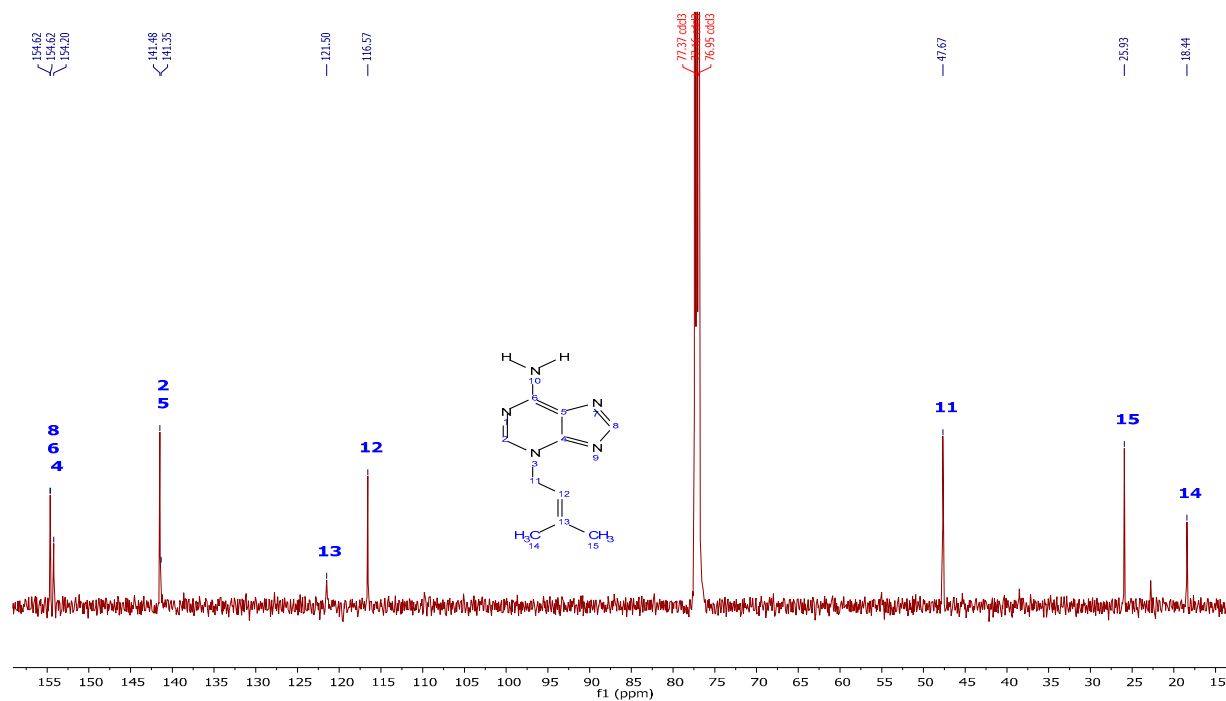

Figure S37:  $^{13}\text{C}$  NMR spectrum of compound **19** ( $\text{CDCl}_3$ , 600 MHz)

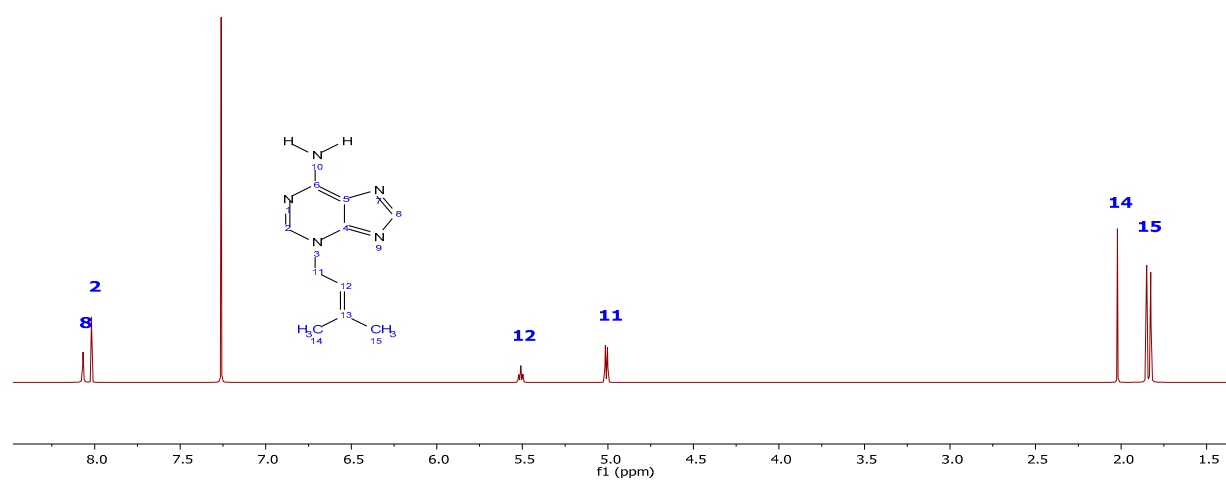

Figure S38:  $^1\text{H}$  NMR spectrum of compound **19** ( $\text{CDCl}_3$ , 600 MHz)
